# Supplementary material for: LISA: a lightweight stratospheric air sampler
Source: Copernicus journal article supplement (doi:10.5194/amt-2018-23), 2018-01-26
Supplement: Supplementary file [file amt-2018-23-AC1-supplement.zip]

# LISA: a lightweight stratospheric air sampler

Joram J.D. Hooghiem<sup>1</sup>, Marcel de Vries<sup>1</sup>, Henk A. Been<sup>1</sup>, Pauli Heikkinen<sup>2</sup>, Rigel Kivi<sup>2</sup>, Huilin Chen<sup>1</sup>

<sup>1</sup>Center for Isotope Research (CIO), Energy and Sustainability Institute Groningen (ESRIG), University of Groningen, Nijenborgh 6, 9747 AG Groningen, The Netherlands.

<sup>2</sup>Finnish Meteorological Institute (FMI), Earth Observation Research, Tähteläntie 62 99600 Sodankylä, Finland.

Correspondence to: Huilin Chen (huilin.chen@rug.nl)

**Abstract.** We developed a new Lightweight Stratospheric Air sampler (LISA). The LISA sampler is designed to collect four bag samples in the stratosphere during a balloon flight for CO<sub>2</sub>, CH<sub>4</sub> and CO mole fraction measurements. It consists of 4 Multi-Layer Foil (MLF) sampling bags, a custom-made manifold, and a diaphragm pump, with a total weight of ~2.5 kg.

A series of laboratory storage tests were performed to assess the stability of CO<sub>2</sub>, CH<sub>4</sub> and CO mole fractions in both MLF and Tedlar bags. The MLF bag was chosen due to its better overall performance than the Tedlar bag for the three species CO<sub>2</sub>, CH<sub>4</sub> and CO. Furthermore, we evaluated the performance of the pump under low-pressure conditions to optimise a trade-off between the vertical resolution and the sample size.

The LISA sampler was flown on the same balloon flight with an AirCore in Sodankylä, Finland (67.368°N, 26.633°E, 179 m.a.s.l.) on 26 April and 4-7 September, 2017. A total of 15 stratospheric air samples were obtained during the ascent of four flights. The sample size ranges between 800 to 180 mL for the altitude between 12 and 25 km, with the corresponding vertical resolution ranging from 0.5 to 1.5 km. The collected air samples were analysed for CO<sub>2</sub>, CH<sub>4</sub> and CO mole fractions, and evaluated against AirCore retrieved profiles, showing mean differences of 0.84 ppm for CO<sub>2</sub>, 1.8 ppb for CH<sub>4</sub> and 6.3 ppb for CO, respectively.

High-accuracy stratospheric measurements of greenhouse gas mole fractions are useful to validate remote sensing measurements from ground and from space, which has been primarily performed by comparison with collocated aircraft measurements (0.15 – 13 km), and more recently with AirCore observations (0 – 30 km). While AirCore is capable of achieving high-accuracy greenhouse gas mole fraction measurements, it is challenging to obtain accurate altitude registration for AirCore measurements. The LISA sampler provides a viable low-cost tool for retrieving stratospheric air samples for greenhouse gas measurements that is complementary to AirCore. Furthermore, The LISA sampler is advantageous in both the vertical resolution and the sample size to perform routine stratospheric measurements of isotopic compositions of trace gases.

## Introduction

The stratosphere plays an important role in the climate of the earth and is affected by ongoing climate change. Changes in stratospheric ozone and water vapour levels in turn affect climate and climate

Deleted: ,

Deleted: and H<sub>2</sub>O

Deleted: four

Deleted: ,

Deleted: and H<sub>2</sub>O

Deleted: earth, and

Deleted: Stratospheric

Deleted: changes i

Deleted: n

variability (Baldwin et al., 2007). The distribution of trace gases in the atmosphere provides useful insights in atmospheric transport and chemistry. Stratospheric tracer observations are essential for validation of General Circulation Models (GCM's). The stratospheric meridional overturning, or the Brewer-Dobson circulation (BDC) was predicted to increase in strength from modelling studies (Butchart, 2014). The mean age of stratospheric air samples was shown to be a good diagnostic for the strength of the BDC; however, no significant change in the strength of the BDC in the northern hemisphere at mid latitudes was detected (Engel et al., 2009, 2017). In spite of all the efforts to make observations of stratospheric tracers, GCM's remain poorly constrained (Gerber et al., 2012), a problem already pointed out several decades ago (Ehhalt et al., 1983).

In order to determine the vertical distribution of trace gases, both remote sensing techniques and airborne platforms are utilized. Remote sensing is performed either from the ground, e.g. TCCON (Wunch et al., 2011), and from satellite instruments like SCIAMACHY (Frankenberg et al., 2011) and IASI (Crevoisier et al., 2013). Although remote sensing techniques have a high spatial and temporal coverage, they are subjected to systematic bias and need to be calibrated. Calibration requires in situ measurements, of which the availability relies on infrequent campaigns (e.g. Engel et al., 2016)

In situ measurements of stratospheric air up to 35 km above mean sea level (a.m.s.l.) can currently only be achieved on balloon-borne platforms. To this end, both airborne analysers (e.g. Daube et al., 2002) as well as sampling techniques have been developed specifically for balloon-borne platforms. Of these techniques, the cryogenic sampling method (Lueb et al., 1975) is the most employed technique. It has been used for the analysis of many trace gases like SF<sub>6</sub>, CO<sub>2</sub>, CH<sub>4</sub>, N<sub>2</sub>O and halocarbons (Aoki et al., 2003; Engel, 2002; Laube et al., 2010; Nakazawa et al., 1995, 2002) and isotopic composition measurements (Kaiser et al., 2006; Rice, 2003; Röckmann et al., 2011; Sugawara et al., 1997). As outlined in Fabian, 1981, cryogenic sampling overcomes the problem of small samples that are obtained from the grab sampling technique. Typically, cryogenic samplers retrieve ~15 samples of 10 to 20 litre at STP (Standard Temperature and Pressure) (Fabian, 1981; Honda, 2004; Lueb et al., 1975) with a sufficiently good vertical resolution of ~1 km (Schmidt et al., 1987). This makes the cryogenic sampling technique suitable for multi-tracer and isotopic composition analysis. Secondly, the cryogenic technique provides a way of contamination-free sampling.

Inasmuch as their accuracy, these samplers and airborne analysers are heavy weight (100-250 kg), which requires sophisticated planning and significant resources for a single launch. As a result of the intensive operation, stratospheric observations have been sparsely made both in time and space. Existing sampling is mainly restricted to the Northern Hemisphere mid-latitudes and polar regions, with the tropics under-sampled. Recently, a light cryogenic sampler (22 kg) using liquid neon (Morimoto et al., 2009) was developed, and launched from a research vessel to retrieve stratospheric air samples in the tropics (Fuqe et al., 2014); however, it is capable of retrieving one sample per flight.

Recently, AirCore has been shown to be a viable method for profile measurements of greenhouse gases (Engel et al., 2017; Karion et al., 2010; Membrive et al., 2017). AirCore is much lighter (2 – 9 kg) compared to the cryogenic sampler and can be launched on weather balloons. The launch of AirCore is

Field Code Changed

Field Code Changed

Deleted: ,

Field Code Changed

Formatted: Font color: Text 1

Field Code Changed

Deleted: Sampling

Deleted: ai

Field Code Changed

Deleted: (

Deleted: ,

Deleted: T

Field Code Changed

Field Code Changed

Field Code Changed

Deleted:

Field Code Changed

Field Code Changed

Field Code Changed

Deleted:

Deleted:

Deleted: The downside of

Deleted: is their

Deleted: a simplified cryogenic sampler capable of retrieving one sample per

Deleted: flight

Field Code Changed

Deleted: was

Field Code Changed

Deleted: ,

Deleted: ,

Deleted: [1]

Deleted: , these campaigns are essential to validation and [2]

Field Code Changed

Deleted: ,

also much simpler than the operation of large-payload cryogenic samplers. Being a passive sampling technique, AirCore does not provide large sample amount from the stratosphere. The volume of air sampled between 0 to 200 hPa (12 to 30 km) by the AirCore ranges from 300 to 600 mL, depending on the geometry of the AirCore. This is problematic for accurate analysis of isotopic compositions or multiple tracers. Sub-sampling of the stratospheric part of the AirCore samples has been used for measurements of  $\Delta^{17}\text{O}$  in  $\text{CO}_2$  (Mrozek et al., 2016) and radiocarbon analysis (Paul et al., 2016). The samples have small sample size, which limits the analytical precision of their analyses. Besides this, the vertical resolution of the samples was low and the altitude registration of these samples was associated with significant uncertainties.

In this work, we present the deployment and field-tests of a new Lightweight Stratospheric Air sampler (LISA). With the LISA sampler, we aim to develop a sampling technique complementary to AirCore. With LISA we aim for a reasonable accuracy of GHG measurements, which does not necessarily meet the WMO recommended compatibility goals of 0.1 ppm, 2 ppb, 2 ppb for  $\text{CO}_2$ ,  $\text{CH}_4$  and  $\text{CO}$ , respectively, but would be sufficient, e.g. to detect the large vertical gradient of  $\text{CH}_4$  in the stratosphere. Moreover, we intend to obtain significantly larger amount of air samples from the LISA sampler than from the AirCore sub-sampler.

The design of the LISA sampler is described in Section 2. The accuracy of the  $\text{CO}_2$ ,  $\text{CH}_4$  and  $\text{CO}$  mole fraction measurements of the LISA samples is assessed by the sample storage test that is detailed in Section 3. The vertical resolution and sample amount are both a function of sampling time and are therefore discussed together in Section 4. Following the development of the sampler, we present the deployment of the sampler in the field and the comparison of the  $\text{CO}_2$ ,  $\text{CH}_4$  and  $\text{CO}$  mole fraction measurements between the LISA sampler and AirCore in Section 5. Finally, we give discussion and conclusions in Section 6 & 7.

## 2 LISA sampler design and operation

We design the sampler to collect stratospheric air samples during a weather-balloon flight, where the balloon typically bursts at  $\sim 30$  km altitude. The total payload of a weather balloon typically ranges between 0.2-12 kg. Therefore, the sampler needs to be lightweight. To achieve this, we have used bags to contain air samples instead of glass or metal flasks that are commonly used for accurate trace gas measurements, and a diaphragm pump instead of previous cryogenic coolers to pump air. Besides these, a datalogger is used to make the system fully automatic during flight. The payload is housed in a Styrofoam package for thermal insulation and to prevent it from damage during landing. Previously the use of a gas pump and Tedlar bags have been successfully used to sample air from a UAV for methane studies (Greatwood et al., 2017).

Fig. 1 shows the schematic diagram of the sampler. The system consists of a diaphragm pump (KNF, product no. NMP 850.1.2 KNDC B) and four Supel Inert Multi-Layer Foil (MLF) bags (Supelco, product no. 30227-U). The pump has a flow capacity of 8 l/min at STP. The pump utilises an EPDM rubber

Field Code Changed

Field Code Changed

Moved down [2]: The design of the LISA sampler is described in Section 2.

Deleted: achieve

Deleted: Besides this

Moved (insertion) [2]

Deleted: time, and

Deleted: is usually a few

Deleted: kilograms

Field Code Changed

Formatted: Font: Not Bold, Not Small caps, Not Expanded by / Condensed by

diaphragm (35 mm diameter) and valves, and a small piece of flexible polyurethane tube. Each bag is equipped with a screw cap combo valve that requires a 180-degree turn to be opened or closed. A servomotor (Hitec, product no. HS-65HB+) operates the valve. The pump and bags are connected to a custom-made manifold, which is made from 5 nylon Tees (Swagelok, product no. NY-400-3) and 5 union elbows (Swagelok, product no. NY-400-9), connected by Kynar tubing (Cole Palmer, product no. EW-95100-02). A fifth screw cap combo valve is placed at the outflow end as the outlet valve, allowing the manifold to be flushed prior to sampling. The pressure inside the manifold is continuously monitored by a pressure sensor (Honeywell HSCMAND015PASA5). A datalogger (Arduino Mega 2560) operates all the electronics during flight, and logs ambient atmospheric pressure and temperature data, as well as the pressure inside the manifold and temperature within the Styrofoam package. The pump requires 24 volts during operation. The power is therefore supplied by eight 3 V lithium ion batteries (CR123A) connected in series. The Arduino is powered by three batteries out of the eight (9 V). The servo motors, powered with 2 separate batteries (6 V). The sampler is placed in a Styrofoam package, with a total weight of ~ 1 kg excluding the package, and ~2.5 kg including the package. The key components are summarised in Table 1.

Formatted: Font: Not Bold

Deleted: 0

Deleted: The same applies to the

Formatted: Font: 12 pt, English (US), Not Small caps, Not Expanded by / Condensed by

Formatted: Font: Not Bold, Not Small caps, Not Expanded by / Condensed by

Because the ascent rate is usually much slower than the descent rate, we take air samples during ascent to optimise the vertical resolution (see Section 4). The sampling process is triggered by starting the pump when the sampler reaches pre-set ambient pressure levels monitored by the on-board pressure sensor. In practice, when the pre-set pressure value is reached during ascent, the pump is started, with the outlet valve open and the other valves upstream of the bags closed, to flush the manifold. After 20 seconds, the outlet valve is closed, and the valve upstream of one of the chosen bags is simultaneously opened to allow sampling. The sampling of air into one bag is completed when a pre-set maximum sampling time is exceeded or the absolute pressure in the manifold is higher than 280 hPa (see Section 4), whichever comes first. The sampling process continues until all four bags are filled. At a certain altitude, the balloon will burst and the sampler falls back to the ground where the samples can be picked up and brought back to the laboratory for analysis.

### 3 Sample storage tests

The stability of trace gases in the sample container is essential for a sampler to obtain accurate measurements of the trace gases. To this end, we have investigated the stability of CO<sub>2</sub>, CH<sub>4</sub>, CO and H<sub>2</sub>O mole fractions of dry air samples in two types of gas sampling bags: Tedlar and Supel Inert Multi-Layer Foil (MLF). The Tedlar bag is composed of a thin polyvinylfluoride film. The MLF bag consists of several layers: polyethylene (inner layer), aluminium foil, polyethylene, aluminium (metalised) and 60-gauge nylon, which provide a moisture barrier and light protection.

Deleted: z

#### 3.1 Experiments

A total of 7 MLF and 7 Tedlar bags were prepared, with dry air (<0.03% ppm H<sub>2</sub>O) from a cylinder; the mole fractions of CO<sub>2</sub>, CH<sub>4</sub> and CO are listed in Table 2. Since the mole fractions of methane are significantly lower in the stratosphere than a typical value of around 2000 ppb in the free troposphere

Deleted: 1

(e.g. Rice et al. 2003; Röckmann et al. 2011), we prepared two samples (nos. 6 & 7) with low mole fractions (~120 ppm CO<sub>2</sub>, ~600 ppb CH<sub>4</sub> and ~75 ppb CO) by diluting air from a cylinder with nitrogen. The CO mole fractions in the stratosphere are also low, but we did not make any storage test for samples with a mole fraction lower than ~75 ppb.

Field Code Changed

Directly after sample preparation, the air sample is analysed for CO<sub>2</sub>, CH<sub>4</sub>, CO and H<sub>2</sub>O mole fractions on a cavity ring-down spectrometer (CRDS, Picarro Inc., model G2401-m). During an actual balloon flight, it usually takes 3 – 5 hours from sampling until the samples are retrieved and brought back to the laboratory for analysis. Therefore, we have chosen a period of 4 hours as the storage time to represent this time delay, i.e. the bags are stored under laboratory conditions (~ 20°C, ~1000 hPa, ambient mole fractions of CO<sub>2</sub>, CH<sub>4</sub>, CO and H<sub>2</sub>O) for four hours before they are analysed again. The four-hour drift during storage is defined as the difference between the measurement after four hours of storage and the initial measurement:  $[X]_{4\text{hours}} - [X]_{\text{direct}}$ , where  $[X]$  is the measured dry mole fraction.

Previous studies show that the material of Tedlar bags is prone to water vapour diffusion (Beghi and Guillot, 2006; Cariou and Guillot, 2006), which leads to humidified air samples after four hours of storage. H<sub>2</sub>O measurements are used to obtain dry mole fraction of CO<sub>2</sub>, CH<sub>4</sub> and CO using the water vapour corrections described in Chen et al., 2013 and Rella et al., 2013, before assessing drift of these species.

Field Code Changed

Deleted: The

Deleted: dry mole fractions are obtained by applying the

Field Code Changed

### 3.2 The storage test results

The difference between the measured mole fractions after 4 hours and those measured immediately after filling are shown in Fig. 2, which captures the drift over 4 hours of storage. The drift in CO<sub>2</sub> after 4 hours is comparable for both types of sampling bags for sample nos. 1-5, within a range of -0.2 – 0.2 ppm (Fig. 2a). Low mole fractions of CO<sub>2</sub>, i.e. samples nos. 6&7, are less stable in both types of sampling bags; however, these low mole fractions are not observed in the stratosphere, and hence the drift observed for samples nos. 1-5 is more representative than that observed for samples nos. 6&7 for the storage of stratospheric air samples. The CH<sub>4</sub> mole fractions are preserved within the range of ± 2 ppb for all cases for both types of sampling bags (Fig. 2b). Although the Tedlar bags perform slightly better than the MLF bags, both are satisfactory for CH<sub>4</sub> measurements when considering its large gradient in the stratosphere (500-2000 ppb e.g. (Röckmann et al., 2011)).

Field Code Changed

The CO mole fractions appear to be stable in the MLF bags, with no clear indication of drift, independent of the mole fractions (Fig. 2c). The variability of CO differences may be in large part due to the repeatability of the CRDS analyser (1σ 7 ppb). In contrast, the CO mole fractions decrease in the Tedlar bags, coupled with a significant increase of water vapour mole fractions of up to ~1% (Fig. 2d), which is due to the high permeability of the bag material to water vapour and has been observed in previous studies (Beghi and Guillot, 2006; Cariou and Guillot, 2006). The increase of water vapour mole fractions in the MLF bags is only up to 0.01%. The observed decrease of CO mole fractions in the Tedlar bags, even when its mole fractions are lower than the ambient, cannot be explained by the permeability of the bag material, as diffusion would increase the CO mole fractions. Although mole fractions are corrected for

Field Code Changed

water vapour to obtain dry mole fractions, we cannot exclude that there is still some remaining bias from the water vapour correction function, and this correction function was not tested before with low mole fractions. This would not affect the depicted results for the MLF bags since the water vapour content remains low. Further investigation is needed before Tedlar bags are used to collect samples for analysis of high-precision CO mole fractions at the ambient level.

We found out that it is necessary to precondition the MLF bags before use, because we observed a positive offset of ~12 ppm CO<sub>2</sub>, ~8 ppb CH<sub>4</sub> and ~30 ppb CO between the immediately analysed results of un-preconditioned MLF bag samples after filling and the assigned cylinder values. This contamination issue could be overcome by preconditioning the bags with N<sub>2</sub>. The bags were filled with N<sub>2</sub> from a cylinder and subsequently evacuated with a vacuum pump, prior to filling with test sample. In principle ambient air can be used to flush the bags, as long as it is dry.

Based on the storage test results, we choose to use the MLF bags for our sampler. The stability of CO<sub>2</sub> and CH<sub>4</sub> mole fractions in both MLF and Tedlar bags is comparable; however, the observed CO mole fractions in Tedlar bags is less stable than those in MLF bags. In addition, the permeability of water vapour to Tedlar bags causes a significant increase of water vapour, which may affect isotopic compositions, e.g.  $\delta^{18}\text{O}$  in CO<sub>2</sub>. Moreover, the aluminium layers of the MLF bag protect the air samples against radiation that could affect the stability of CO mole fractions. We emphasise the importance of preconditioning the MLF bags before use.

### 3.3 The uncertainty of the LISA sample measurements

We estimate the measurement uncertainty based on the laboratory storage test results and the uncertainties associated with the sample analysis. The total uncertainty of CO<sub>2</sub>, CH<sub>4</sub> and CO mole fraction measurements consists of 3 terms: sampling error, drift due to storage and analysis uncertainty. There are two contributions to the analysis uncertainty: 1) analyser precision ( $\sigma_a$ ) and 2) calibration uncertainty ( $\sigma_c$ ).

The sampling error encompasses any contamination introduced by the sampling system itself. This includes chemical production of the species of interest and residual air in any dead volumes of the manifold. The chemical production during sampling is likely to be very small for two reasons. First of all, the wetted surfaces, Kynar and EPDM diaphragm, are chemically inert. Secondly, the high flow rate minimizes exposure of the sample to materials used in the sampler and hence chemical interaction with the wetted surfaces is limited. In addition, the flushing procedure with high flowrates ensures multiple turnovers of the manifold, which reduces the surface effects on the sample. These effects are thus assumed to have no influence on the CO<sub>2</sub>, CH<sub>4</sub> and CO mole fractions.

The dead volume in the tube connecting the bag to the manifold is a potential source of contamination bias. The dead volume is estimated to be 1.5 mL per sample and will be at local ambient pressure prior to sampling. The dead volume uncertainty,  $\sigma_p$ , is estimated using a dead volume of 1.5 mL<sub>stp</sub>, which prior to sampling is assumed to be at 50 hPa and 220 K. This volume might remain unflushed, hence the air is of tropospheric origin, with concentrations of 400 ppm CO<sub>2</sub>, 1800 ppb CH<sub>4</sub> and 150 ppb CO. The total

Deleted: n

Formatted: English (UK)

Deleted: ¶

Deleted:

Moved (insertion) [1]

Deleted: analyser

Deleted: We do not include any sampling error in the presented evaluation

sample volume is 200 mL<sub>stp</sub> and has mole fractions of 395 ppm CO<sub>2</sub>, 500 ppb CH<sub>4</sub> and 30 ppb CO. The bias is then calculated as the resulting deviation after mixing the contamination with sample air.

The main factor likely to affect mole fraction measurements of the stratospheric air samples is the drift in the sampling bags, an effect that has been quantified in Section 3.1 & 3.2. In principle, one could correct for the drift as a systematic error. The drift, a consequence of diffusion through the bag's material, is governed by Fick's first and second law. A systematic correction for the drift would require the determination of the species-dependent diffusivity, which usually depends on pressure and temperature. Secondly, since diffusion depends on the concentration gradient, mole fractions of the sampler environment are needed. Hence, detailed information about storage conditions over the 3-5 hour period between sampling and analysis are required to correct for the drift. Moreover, the information required is usually unavailable in the field. Therefore, we have not determined a correction function for the drift, but rather use the maximum observed drift as an estimate of the drift uncertainty,  $\sigma_d$ . The maximum observed drift in these tests were 0.11 ppm, 2 ppb and 2.7 ppb for CO<sub>2</sub>, CH<sub>4</sub> and CO, respectively.

Assuming Gaussian error propagation, we compute a total uncertainty on the measurements:

$$\sigma_s = \sqrt{\sigma_d^2 + \sigma_i^2 + \sigma_c^2 + \sigma_v^2} \quad (1)$$

The total uncertainty includes the analyser precision (1 sigma 0.04 ppm, 0.2 ppb and 7 ppb for CO<sub>2</sub>, CH<sub>4</sub> and CO, respectively), the calibration uncertainty (0.07 ppm, 1 ppb, 2 ppb for CO<sub>2</sub>, CH<sub>4</sub> and CO, respectively), and the aforementioned drift.

The different uncertainties are summarised in Table 3. We compute the total uncertainty of the LISA sample measurements to be 0.14 ppm, 2.3 ppb and 7.8 ppb for CO<sub>2</sub>, CH<sub>4</sub> and CO, respectively.

#### 4 The vertical resolution and the pump performance

The vertical resolution of each individual air sample depends on the vertical speed of the sampler during flight, and the effective sampling time, i.e. when the flow rate into the sampling bag is positive. On the other hand, the amount of air sample collected into each sampling bag is determined by the sampling time and the sampling flow rate. Due to the trade-off between the vertical resolution and the sample size, we evaluate the pump performance to assist the choice of the sampling time.

Under laboratory conditions the KNF pump can maintain a flow rate of up to 8 L<sub>stp</sub>/min. The performance of the small diaphragm pump is to our best knowledge not previously investigated under the atmospheric conditions in the stratosphere, e.g. at low-temperature and low-pressure conditions.

We evaluated the sampling performance using a simplified version of the sampler under simulated conditions in the laboratory. The test version of the sampler consisted of the KNF pump, the outlet valve

**Deleted:** , although it might be significant for high-precision measurements, especially for CO in the stratosphere when the ozone concentration is high.

**Deleted:** However

**Deleted:** s

**Deleted:** , which

**Deleted:** made any correction

**Moved up [1]:** There are two contributions to the analysis uncertainty: 1) analyser precision ( $\sigma_i$ ) and 2) calibration uncertainty ( $\sigma_c$ ).

**Deleted:** →

**Deleted:**

**Deleted:** 2

**Deleted:** s

**Deleted:** l

**Deleted:** at STP



and one sampling bag, supported by the required electronics (pressure and temperature sensors, a datalogger and batteries). The test version was placed in a 50-litre vessel for testing. The pressure inside the vessel was regulated by a vacuum pump, mimicking the atmospheric pressure levels in the stratosphere. After a desired pressure level was reached, the vacuum pump was switched off, and the sampler sampled air for 153 seconds. The experiment was repeated at 3 different pressure levels. Using the manifold pressure and temperature data within the vessel, logged at 3 Hz, we calculate the sampled air volume at STP using the ideal gas law as a function of sampling time. **The experiments were performed at room temperature.**

Deleted: ↗

The pressure readings are initially constant, while the bag is expanding to its full size of 2.58 **litre**. Afterwards, the pressure starts to increase when air is compressed. We assume that the bag has expanded to its full size when the pressure starts to increase. Furthermore, the results allowed us to create a simple empirical model to calculate the sampled air volume as a function of sampling time at all pressure levels. It provides a useful tool to quickly estimate the expected sample size and vertical resolution during field campaigns.

Deleted: litres

Fig. 3a shows the sampled air volume at STP as a function of the sampling time in seconds, for three different pressure levels (31.5 hPa, 60.8 hPa and 117.7 hPa) in the vessel. The volume is calculated with the ideal gas law, using the logged manifold pressure and temperature. The volume of the bag is estimated to be 2.58 **litre**. The 3 Hz pressure data was averaged into 5 s bins, to reduce the random noise of the pressure measurements and to smooth the pressure wave induced by the stroke of the pump. The sampled air volume increases linearly with the sampling time when the bag expands to its full size during the first **20±1 second. The moment compression is required, pressure starts increasing rapidly, and this moment was found to be 20 seconds after filling initiated.** Afterwards, the increase rate slows down due to reduced flow rates that result from the increasing pressure difference across the pump. The gain in sampled air volume within equal sampling time thus becomes less at longer sampling time.

Deleted: litres

Deleted: 19.7

Deleted: seconds

Deleted:

Furthermore, we show the sampled air volume as a function of the vessel pressure in Fig. 3b. Here the sampling times of 50, 100 and 150 seconds are arbitrarily chosen. For each sampling time, the sampled air volume is interpolated from the data shown in Fig. 3a and appears to be linear to the chamber pressure. Hence, we fit the following linear equation to the derived data in Fig. 3b,

$$V_{stp} = a(t)p_a, \quad (2)$$

Deleted: →

Where  $p_a$  (in hPa) is the ambient pressure in the vessel,  $V_{stp}$  is the sample amount in litre at STP and  $a$  is a function of the sampling time ( $L_{stp}/hPa$ ). We performed a series of linear fits for the sampling time ranging from 0 to 150 seconds at an interval of 10 seconds, and derived corresponding linear coefficients  $a$  as a function of sampling time (see Fig. 3c). To model  $V_{stp}$  as a function of pressure  $p_a$  and sampling time  $t$ , the linear coefficient  $a(t)$  in Eq. (2) is empirically modelled using the following function:

$$a(t) = x - b * e^{-(t-t_0)/\tau}, \quad (3)$$

Deleted: →

where  $t$  is sampling time and  $x$ ,  $b$  and  $\tau$  are constant parameters used for the fit.  $t_0=19.7$  seconds is the time required to fill the bag up to chamber pressure, and the model is only valid for  $t>19.7$  seconds. Eq.



(3) is fitted using the non-linear least squares method to obtain an empirical model for the slope  $a(t)$  in Eq. (2).

Deleted: , and the fitted parameters are presented in Table 2

Combining Eq. (1) and Eq. (2), the sampled volume at STP can be approximated for all pressure levels ranging from 200 to 0 hPa for any chosen sampling time. The derived sample volume is shown as a function of ambient pressure or altitude in Fig. 3d for the sampling time of 50, 100, 200 and 1000 seconds, respectively. The International Standard Atmosphere is used to link ambient pressure and altitude. The gain in the sample size from 200 to 1000 seconds of sampling is very small due to the saturation of the pumping capacity; however, the vertical resolution would on the other hand be compromised severely. Assuming an ascent speed of the balloon of  $5 \text{ m s}^{-1}$ , the corresponding vertical resolutions would be 1 km and 5 km for the sampling time of 200 s and 1000 s, respectively.

Deleted: modelled

An upper limit to the amount of air samples in the MLF bag was found due to its sealing capacity. The bag's seal was observed to break when a differential pressure of  $\sim 300 \text{ hPa}$  between the inside and the outside of the bag is reached. The maximum allowed pressure serves as a practical limit to the sample size that can be achieved, which is presented in Fig. 3b with a horizontal line, and in Fig. 3d with a vertical line. During flight, the payload is usually lifted up to  $\sim 30 \text{ km}$  ( $\sim 10 \text{ hPa}$ ), which means the pressure inside the MLF bag can be at maximum  $\sim 310 \text{ hPa}$ . Conservatively, we set the maximum absolute pressure in the MLF bag during flight not higher than  $280 \text{ hPa}$  to avoid any potential loss of sample due to the burst of the bag.

Deleted: To be on the safe side

The model provides a good tool to design the sampling strategy in the field. It should be noted that the simplification of the model causes uncertainties in the estimated sample size. On one hand, this model does not take the temperature in the real conditions into account. Since air in the stratosphere is usually cold e.g.  $220 \text{ K}$ , the total sampled volume at STP would be larger than the modelled, due to thermal expansion. On the other hand, the model assumes a constant upstream pressure, whereas the upstream pressure decreases during flight, and hence the total sampled volume at STP would be then smaller than the modelled.

Deleted: 4

## 5 Flights and validation

Following the laboratory experiments described above, we deployed the sampler in the field. A total of 4 flights were performed in Sodankylä, Finland ( $67.368^\circ\text{N}$ ,  $26.633^\circ\text{E}$ ,  $179 \text{ m.a.s.l.}$ ) at the Finnish Meteorological Institute's (FMI) Total Carbon Column Observing Network (TCCON) facility (Kivi and Heikkinen, 2016). The facility includes a high-resolution Fourier Transform Spectrometer installation to retrieve column-averaged abundances of atmospheric constituents, gas analysers for in situ measurements and both manual and automatic radiosonde systems. The flights were performed on four different days, on 26 April, 4–6 September, 2017, respectively. We aimed to collect four air samples during each flight at four pre-set pressure altitudes. The settings of the sampling parameters are summarized in Table 4. The sampling parameters varied from flight to flight, to test the capabilities of the sampler.

Field Code Changed

Deleted: analysers

Deleted: 3

The payload consisted of an AirCore, LISA Sampler, a payload positioning system that uses both Iridium and GPS/GSM positioning, a lightweight transponder and a Vaisala RS92-SGP radiosonde (Dirksen et al., 2014). This configuration allowed for a direct comparison between AirCore and sampler measurements. The AirCore used during the campaign consists of two pieces of stainless steel tubing (40 m long ¼ in. OD and 60 m long 1/8 in. OD, wall thickness 0.01 in.), with a total weight of ~3.6 kg. The LISA sampler package weighed 2.8 kg. After retrieval of the payload, the samples were analysed in the TCCON laboratory for CO<sub>2</sub>, CH<sub>4</sub> and CO mole fractions using the same CRDS analyser as used in our laboratory, whereas the AirCore sample analysis was done on a second CRDS analyser for CO<sub>2</sub>, CH<sub>4</sub> and CO mole fractions. Two different sets of calibration gases were used for the AirCore and the sampler sample analysis. Although both sets of calibration gases are ultimately on the same scales (CO<sub>2</sub>: X2007, CH<sub>4</sub>: X2004A and CO: X2014A), we cross checked the calibration gases on one CRDS analyser to eliminate any difference that may exist between the two sets of calibration gases.

During the flights, temperature, air pressure and pressure in the manifold were logged with a frequency of 0.8 Hz. The temperature was measured near the batteries and pump, for diagnostic purposes. Ambient atmospheric temperature was measured with the radiosonde. The logged pressure and radiosonde temperature data allowed us to quantify the sample size (Section 5.2) and to calculate the pressure weighted mean altitude of the samples (Section 5.1). The altitude provided by the radiosonde is used for calculation of the vertical resolution of the samples (Section 5.2).

Fifteen samples were successfully obtained from four flights. During the first flight on 26 April 2017, only time and the start and end time of sampling were logged due to a malfunction in the datalogger. As the time stamp of the datalogger is reported in UTC, we are able to sync the sampling information from the datalogger with atmospheric measurements of temperature, pressure and altitude from the radiosonde on the same payload. This is subsequently used to estimate the vertical resolution and the sample size using the empirical derived function in Section 4. During the same flight, the AirCore datalogger failed to record any data (e.g. coil temperature, valve closing time), and the temperature data from a flight performed two days earlier, on 24 April 2017, has been used to retrieve the AirCore profiles. During the flight on 4 September 2017, the sampler was unsuccessful to take a sample at the 200 hPa pressure level, because the maximum allowed pressure in the manifold was reached during the short time between the closure of the outlet valve and opening of the sampling bag. Reversing the order of closure of the outlet valve and opening of the sampling bag fixes this problem.

### 5.1 The weighted mean sampling pressure of the samples

During sampling of each bag, the atmospheric pressure decreases as the payload ascends, and the volume flow rate drops due to a nonlinear increase of pressure in the bag. Therefore, not all atmospheric pressure levels contribute equally to the collected sample in size or mole fractions of trace gases. The integrated sample thus has an associated pressure weighted mean altitude. The contribution of each pressure level to one sample is proportional to the number of moles of air sampled at that pressure level. In general, the first 19.7 seconds of sampling contribute the most and the end of sampling contributes the least to the

Deleted: (H. Chen in prep)

Field Code Changed

Deleted: The

Deleted: field

Deleted: . The detailed information is provided in Chen et al, in prep

collected sample. When pressure and temperature within the manifold are measured, the number of moles of air at each pressure level can be computed directly, and the weight of that pressure level will be:

$$w_i = \frac{dn_i}{n}, \quad (4)$$

where  $dn_i$  is the number of moles of air sampled at the pressure level  $p_i$ ,  $n$  is the total number of moles of collected air samples.  $w_i$  is then the weight of the air samples collected at the pressure level  $p_i$ . The altitude weighted mean  $\bar{p}$  can be calculated as follows:

$$\bar{P} = \sum_i w_i P_i, \quad (5)$$

The first 19.7 seconds of sampling cannot be calculated directly, since  $dp_i = 0$ , i.e. no compression and the pressure inside the bag is the same as outside. We assign the first weight that can be calculated to the first 19.7 seconds of sampling.

The temperature of the air samples in the bag was not directly measured. For the calculation of the weighted mean sampling pressure of the samples, we assume constant temperature of the sampled air while sampling. In reality, the temperature of the air samples in the bag would be close to the ambient temperature as the bag is directly exposed to the ambient. Since the observed variability of the ambient temperature during sampling is usually less than 1 Kelvin (1 sigma), the assumption of constant temperature during sampling causes insignificant uncertainty on the weighted mean sampling pressure.

## 5.2 Vertical resolution and sample size

Both the volume of the collected air samples (Fig. 4a) and vertical resolution decreases (Fig. 4b) with increasing altitude. The sample size achieved by the sampler is close to that estimated based on the empirical model shown in Section 4. The variability of the collected sample size can be mostly explained by the different settings for the sampling time and the maximum allowed pressure during different flights (see Table 4). Furthermore, the cold temperatures in the stratosphere result in denser air, so the observed sample size are slightly higher, especially in the lower stratosphere.

The variability in the vertical resolution is the result of three factors: 1) varying sampling time; 2) varying ascending speed; 3) varying maximum allowed pressure. The ascending speed was typically around 7-9 m s<sup>-1</sup> in the lower stratosphere, and decreased to 4-5 m s<sup>-1</sup> in the middle stratosphere. The varying ascending speed accounts for the observed deviations from the otherwise linear trend in Fig. 4b. In the lower stratosphere (10 to 15) km the maximum allowed pressure inside the bags was usually reached in a period shorter than the pre-set sampling time, leading to relatively high vertical resolution. In the region 10 to 15 km two samples deviate (4-Sep 17 km and 26-April 14 km), with lower resolution, which is due to a higher ascending speed. In the middle stratosphere, the sampling time was usually the limiting factor to vertical resolution. One sample in the middle stratosphere has a relatively good vertical resolution (5-Sep, 25 km), which is due to the relatively slow ascent speed.

While the sampler was still collecting the last sample during the flight on 6 September 2017, the balloon burst at a lower altitude (21.4 km) than previous flights. The vertical resolution of that particular sample

Deleted: As

Deleted: decreases with altitude (Fig. 4a), the vertical resolution increases (Fig. 4b).

Deleted: 3

Deleted: ,

Deleted: .

Deleted:

was estimated to be 3.1 km (not shown), a number much larger than that of other samples due to the fast descending speed of 16.8 m s<sup>-1</sup> after burst.

### 5.3 Comparison with AirCore measurements

The vertical profiles of CO<sub>2</sub>, CH<sub>4</sub> and CO mole fractions from both AirCore and LISA measurements are presented in Fig. 5. For the retrieval of the AirCore profiles we refer to (Chen et al. in prep). AirCore and LISA measurements are compared based on the same pressure level. For a fair comparison, we average the AirCore profiles with the same weights that are used to calculate the weighted mean sampling pressure of the samples. The mean differences between AirCore and LISA measurements of CO<sub>2</sub>, CH<sub>4</sub> and CO mole fractions are summarized in Table S<sub>4</sub>.

A relatively large difference in the CO<sub>2</sub> mole fractions (>1 ppm) between LISA and AirCore is clearly visible for the flight on 26 April 2017. The observed difference is much larger than the uncertainty caused by the drift of CO<sub>2</sub> mole fractions due to storage in the MLF bag (shown in Fig. 2a) and cannot be explained by any known reasons. The differences of the CO<sub>2</sub> mole fractions for other flights are significantly smaller. The summertime stratosphere is only affected by weak diabatic stirring (Holton et al., 1995; Plumb, 2002, 2007), and can be considered relatively stable. Therefore, the flights on 4 - 6 September 2017 can be, to a large extent, considered duplicate measurements. This is supported by the excellent agreement between the AirCore profiles of CO<sub>2</sub> and CH<sub>4</sub> mole fractions during those dates. The AirCore datalogger failure on 26 April 2017 may cause increased uncertainty in the altitude registration of the AirCore measurements, whereas the malfunction of the LISA datalogger during the same flight may cause increased uncertainty in the weighted mean sampling pressure of the samples. Therefore, we also calculated the mean differences excluding the flight on 26 April 2017, which decreases the mean difference in CO<sub>2</sub>, but slightly increases the difference in CO.

CO mole fractions agree well during all flights, except that a small decrease with altitude was observed by LISA measurements in September 2017, but not captured by AirCore measurements. A good agreement between AirCore and LISA CO measurements is found for the flight on 26 April 2017. Besides this, an interesting CO plume at 13.5 km is observed by both AirCore and LISA during the flight on 5 September 2017.

## 6 Discussion

### 6.1 LISA sampler comparison with AirCore measurements

The deviation between AirCore and sampler results are on average 0.84 ppm for CO<sub>2</sub>, a result that is comparable in magnitude to AirCore inter comparisons (e.g. Engel et al., 2017; Membrive et al., 2017). For methane, we find a mean deviation of 1.8 ppb, within the uncertainties of both AirCore and LISA (see Section 3.3). CO also shows a good agreement within the measurement uncertainty of CO by the CRDS analyser.

Field Code Changed

Deleted: 4

Deleted: ), and

Field Code Changed

Deleted: 6 September

Field Code Changed

Several aspects are considered that could explain the observed differences. First of all, the altitude registration of AirCore measurements is associated with uncertainties, as outlined by (Membrive et al., 2017), especially due to the manual selection of the start and the end of AirCore sample analysis or any potential loss of air samples in case of valve malfunction, which complicates the comparison between AirCore and the sampler. Secondly, there are uncertainties associated with the calculation of AirCore weighted mean. The AirCore profile needs to be weighted for a fair comparison, since air samples at different altitudes (or pressure levels) do not contribute equally to the sampler samples. The uncertainty in altitude of the AirCore profile adds a level of uncertainty to the AirCore weighted mean. Finally, the retrieved AirCore profiles are already smoothed due to molecular diffusion and Taylor dispersion, and smearing effects in sample renewal of the cavity of the CRDS. For more information on the uncertainties associated with AirCore profiles we refer to Engel et al. (2017), Karion et al. (2010) and Membrive et al. (2017).

In the first flight on 26 April, an averaged difference of ~1 ppm in CO<sub>2</sub> is observed, which cannot be explained by the associated uncertainties or by smoothing of the AirCore profile due to diffusion. The samples were taken at a distance no more than 1.5 km apart (determined from Vaisala GPS-data) in the stratosphere, with less than 1.5 hours in between LISA and AirCore sampling. Such large horizontal mole fraction gradients are not expected in the stratosphere, although stratospheric dynamics in winter show a higher degree of variability in measured trace gases. The AirCore valve did not close during the 26 April 2017 flight. This complicates the altitude registration of the AirCore, especially on the lowest part of the profile. The influence on the stratospheric part of the profile is limited, which can be seen from the large degree of agreement in CH<sub>4</sub> profiles between AirCore and LISA.

Another potential source for the bias is outgassing from the packaging material and the balloon. As the ambient pressure decreases during ascent of the balloon flight, the desorption of trace gasses from the surface of the packaging material and the balloon occurs, which potentially influences the mole fractions of the air samples. This would, however, not explain the good agreement during the September flights. Furthermore, the inlet is located at the top of the payload and any outgassing from the packaging material would be flushed away from the inlet during ascent.

The seasonality in tropospheric CO<sub>2</sub> that causes the difference between sampled air and its storage environment could contribute to the observed difference. The northern hemisphere winter CO<sub>2</sub> mole fractions are typically 10 ppm higher those in summer. During the storage test with low mole fractions, e.g. sample nos. 6&7 in Figure 2, a drift of up to 0.8 ppm was observed. Therefore, a typical seasonal difference of 10 ppm could only explain a difference of 0.03 ppm in the observed CO<sub>2</sub> bias.

As seen from Table 5, the mean deviation for CO<sub>2</sub> reduces from 0.84 to 0.55 ppm, when the 26 April 2017 flight is excluded. Still, the sampler shows consistently higher CO<sub>2</sub> mole fractions than AirCore, which suggests that a small unexplained bias might exist in the LISA CO<sub>2</sub> mole fraction measurements compared to AirCore. CH<sub>4</sub> and CO on the other hand show an excellent agreement within measurement uncertainties, which suggests that no significant bias exist within the measurement uncertainties for CH<sub>4</sub> and CO.

Field Code Changed

Formatted: English (UK)

Deleted: (

Deleted: ,

Deleted: b

Formatted: English (UK)

Deleted: ;

Deleted: ,

Deleted: ;

Deleted: ,

Deleted: 7

Deleted: )

Formatted: English (UK)

Formatted: English (UK)

Formatted: Font: Not Italic, English (UK)

Formatted: English (UK)

Formatted: English (UK)

## 6.2 Vertical resolution and sample size

The vertical resolution of the collected stratospheric air samples ranges from 500 to 1500 m, and the sample size ranges from 800 to 180 mL<sub>stp</sub>. The vertical resolution and sample size **thus outperform** the AirCore. The vertical resolution and sample size of the LISA sampler is compared to the performance of AirCore subsampled air in Table 6. It shows that sampler outperforms the subsample method described in Paul et al., 2016 and Mrozek et al., 2016.

As mentioned previously, the vertical resolution depends on the ascending speed and the effective sampling time, and the sample size also depends on the effective sampling time. To this end, the effort in collecting more air samples by increasing the effective sampling time will compromise the vertical resolution. The vertical resolution can be improved by lowering the ascending speed and decreasing the sampling time. The pump works most effectively when the pressure difference across it is minimal. From the results shown in Fig. 3d, we see that after 200 seconds of sampling the gain in sample amount decreases **quickly**. Therefore, the gain in sample amount, for example adding 10 extra seconds of sampling time, **is small, however the decrease in vertical resolution is significant**.

During the experiments described in Section 4, the pump was at room temperature. The pump performance could be affected by the cold environment. First, the batteries could lose capacity and cause the power supplied to the pump to decrease. The temperature inside the thermally insulated package, where the pump is located, during flight ranged between 30 and -15 °C. Secondly, the diaphragm is exposed to the cold air passing through the pump. The elasticity of a rubber is temperature dependent, which could reduce the performance of the pump. On the other hand, heat is released during operation of the pump, which increases the temperature. Finally, the effect of air temperature on sample size follows the ideal gas law, and the sample size increases at low temperatures. As no experimental data is available to determine the performance of the pump at stratospheric temperature, we assume that the pump performs the same during flight as at room temperature for the calculation of the sample size.

The sample size can be increased by using an alternative pump that can deliver a higher flow rate than the current 8 L<sub>stp</sub>/min and using sampling bags with a larger size than the current 2.58 L. It will be mostly practical to increase the size of the sampling bag because this does not add significant weight or power consumption. An alternative more powerful pump could potentially increase the sample size, especially for the samples from high altitudes; however, it would also likely add more weight and consume more power that in turn increases the weight due to the need **for** more batteries.

Alternatively, to increase the amount of sample retrieved during one flight, additional bags can be considered. Currently the system is idle during several stages of the ascent as can be inferred from Fig. 5. This will however be more demanding on battery power. Furthermore, care has to be taken to avoid overlapping sampling schemes i.e. sampling of a sample at altitude P<sub>1</sub> is still ongoing while the set-point

**Deleted:** The deviation between AirCore and sampler results are on average 0.5 ppm or 0.13 % for CO<sub>2</sub>, a result that is comparable in magnitude to AirCore inter comparisons, (e.g. Engel et al., 2017; Membrive et al., 2017). For methane, we find a deviation of 5 ppb, or 0.33 %. However, the altitude registration of AirCore measurements is associated with uncertainties, as outlined by (Membrive et al., 2017), especially due to the manual selection of the start and the end of AirCore sample analysis or any potential loss of air samples in case of valve malfunction, which complicates the comparison between AirCore and the sampler.

Two aspects contribute to errors in the AirCore weighted mean. First of all, the AirCore profile needs to be weighted, since not all the pressure levels contribute equally to the sampler samples. The uncertainty in altitude of the AirCore profile adds a level of uncertainty to the AirCore weighted mean. Secondly, the retrieved AirCore profiles are already smoothed due to molecular diffusion of air samples from the time when it is sampled until analysed. Even though the AirCore might have been affected by diffusion, AirCore and Sampler show excellent agreement, with mean AirCore sampler differences of 0.84 ppm for CO<sub>2</sub>, 1.8 ppb for CH<sub>4</sub> and 6.3 ppb for CO.

In the first flight on 26 April, an averaged difference of ~1 ppm in CO<sub>2</sub> is observed, which cannot be explained by the associated uncertainties or by smoothing of the AirCore profile due to diffusion. The samples were taken at a distance no more than 1.5 km apart (determined from Vaisala GPS-data) in the stratosphere, with less than 1.5 hours in between LISA and AirCore sampling. Such large horizontal mole fraction gradients are not expected in the stratosphere, although stratospheric dynamics in winter show a high degree of variability in measured trace gases.

**Formatted:** English (UK)

**Formatted:** English (UK)

**Deleted:**

**Deleted:** therefor

**Deleted:** outperforms

**Deleted:** 5

**Field Code Changed**

**Field Code Changed**

**Deleted:** ,

**Deleted:** fast

**Deleted:** does not increase

**Deleted:** , but compromises

**Deleted:** the

**Formatted:** English (UK)

**Formatted:** English (UK)

**Formatted:** English (UK)

**Deleted:** ,

**Deleted:** litres

**Deleted:** of

altitude for sample two,  $P_2$  is reached. This is complicated further with variable ascent speed, that is typical for these balloon flights.

### 6.3 Uncertainty in sample amount and vertical resolution

The accuracy in sounding of the Vaisala RS92-SGP pressure sensors is 1 hPa respectively at 200 hPa, and 0.6 hPa in the range 100-3 hPa, (Vaisala, 2013). The uncertainty of RS92-SGP pressure altitude is discussed in detail by Dirksen et al. (2014). The uncertainty of the vertical position of the RS92-SGP radiosonde is 20 m and hence is also the uncertainty of the pressure weighted altitude mean. Since the vertical resolution is calculated as the altitude where sampling stops minus the altitude at which sampling starts, the uncertainty in vertical resolution of the sampler is 29 m, calculated using Gaussian error propagation.

The uncertainty in the estimated sample amount is a result of the uncertainty in pressure and temperature measurements. The pressure sensor in the manifold has an uncertainty of 2.6 hPa (Honeywell, n.d.) whereas the radiosonde temperature measurements have an 1 sigma uncertainty of 0.25 K in sounding (Vaisala, 2013). This results in an error in estimated sample amount of 7.6 mL<sub>stp</sub>.

Since the manifold pressure was not logged during the flight on 26 April, the pressure weighted altitude mean of the samples had to be estimated using Eq (2) and (3). As mentioned earlier Eq (3) assumes a constant upstream pressure, which is not the case during flight where the pressure decreases. This results in errors in both the estimated sample amount and the estimated mean pressure altitude. The error in the fit parameters, is included in the calculation. The error in  $p_b$  (Eq (1)) can be calculated using the uncertainties of the fit (Eq (2)) and the pressure and measurements can be calculated using standard error propagation. The error in sounding of the pressure sensors is 1 hPa respectively at 200 hPa (Vaisala, 2013). The total uncertainty after 200 seconds of sampling is 9 mL<sub>stp</sub>, slightly higher than the effect found above.

### 6.4 Uncertainty of potential isotopic composition measurements

The stratospheric air samples can be used for analysis of isotopic composition measurements of trace gases. Here we take CO<sub>2</sub> and CH<sub>4</sub> as an example to estimate the uncertainties of isotopic composition measurements due to the storage bias (see Table 3) or the AirCore-LISA bias (see Table 5), and the estimated isotopic signatures associated with the assumed contamination source.

For any species, the measured number of molecules  $n_m$  is the sum of the number of molecules from the original source,  $n_s$ , and the contamination  $n_c$  that entered the sampling bag through diffusion:

$$n_m = n_s + n_c \quad (6)$$

Diffusion is governed by Fick's law:

$$J = D \frac{\partial C}{\partial x} \quad (7)$$

Deleted:

Field Code Changed

Field Code Changed

Field Code Changed

Deleted:

Deleted: Using the parameters presented in Table 3

Field Code Changed

Deleted: the uncertainty

Deleted: I

Formatted: Underline, English (UK)



|                                                                                                                                                                                                                                                                                                                                                                                                                                                                                                                                                                                                                                                                                                                                                                                                           |                    |
|-----------------------------------------------------------------------------------------------------------------------------------------------------------------------------------------------------------------------------------------------------------------------------------------------------------------------------------------------------------------------------------------------------------------------------------------------------------------------------------------------------------------------------------------------------------------------------------------------------------------------------------------------------------------------------------------------------------------------------------------------------------------------------------------------------------|--------------------|
| Where $J$ is the diffusion flux, $D$ the diffusivity and $\frac{\partial C}{\partial x}$ the concentration gradient of diffusing species, e.g. $\text{CO}_2$ . Each layer of the MLF bag has its own specific diffusivity and sorption characteristics, and for simplicity here we assume that it can be modelled with a single diffusivity constant that is only species-dependent. The process of sorption of gases into the solid material and the interaction governing that process is also ignored for simplicity. Then the total diffusion out of the bag which is of stratospheric origin, denoted by $y_{\text{out}}$ . The total amount diffusing into the bag, denoted by $y_{\text{in}}$ is of tropospheric origin. Assuming that these two fluxes can be modelled with a law of mass action: | Formatted ... [3]  |
| $y_{\text{in}} = DC_{\text{in}}$                                                                                                                                                                                                                                                                                                                                                                                                                                                                                                                                                                                                                                                                                                                                                                          | Formatted ... [4]  |
| and                                                                                                                                                                                                                                                                                                                                                                                                                                                                                                                                                                                                                                                                                                                                                                                                       | Formatted ... [5]  |
| $y_{\text{out}} = DC_{\text{out}}$                                                                                                                                                                                                                                                                                                                                                                                                                                                                                                                                                                                                                                                                                                                                                                        | Formatted ... [6]  |
| Where $C_{\text{out}}$ is the concentration of ambient air that contaminates the stratospheric sample in the bag denoted by $C_{\text{sc}}$ . The bias that we measure is as follows:                                                                                                                                                                                                                                                                                                                                                                                                                                                                                                                                                                                                                     | Formatted ... [7]  |
| $\text{bias} = y_{\text{in}} - y_{\text{out}}$                                                                                                                                                                                                                                                                                                                                                                                                                                                                                                                                                                                                                                                                                                                                                            | Formatted ... [8]  |
| Assuming that $y_{\text{out}}$ is purely stratospheric and $y_{\text{in}}$ is purely tropospheric, and that $C_{\text{out}}$ and $C_{\text{in}}$ are mole fractions outside and inside the bags and are assumed to be constant. We can estimate the fraction of tropospheric contamination in our sample. The measurement ( $C_{\text{m}}$ ) is the sum of the original stratospheric sample ( $C_{\text{s}}$ ), minus the sample that is leaving the bag and the tropospheric sample entering the bag:                                                                                                                                                                                                                                                                                                   | Formatted ... [9]  |
| $C_{\text{m}} = C_{\text{s}} - y_{\text{out}} + y_{\text{in}}$                                                                                                                                                                                                                                                                                                                                                                                                                                                                                                                                                                                                                                                                                                                                            | Formatted ... [10] |
| And the contaminating fraction is then $f_{\text{c}}$ is                                                                                                                                                                                                                                                                                                                                                                                                                                                                                                                                                                                                                                                                                                                                                  | Formatted ... [11] |
| $f_{\text{c}} = \frac{y_{\text{in}}}{C_{\text{m}}} = \frac{C_{\text{c}} \cdot \text{bias}}{C_{\text{m}}(C_{\text{s}} - C_{\text{sc}})}$                                                                                                                                                                                                                                                                                                                                                                                                                                                                                                                                                                                                                                                                   | Formatted ... [12] |
| Where the right-hand side is obtained by using Eq. (8) to (10). The sample fraction, $f_{\text{s}}$ is simply                                                                                                                                                                                                                                                                                                                                                                                                                                                                                                                                                                                                                                                                                             | Formatted ... [13] |
| $f_{\text{s}} = 1 - f_{\text{c}}$                                                                                                                                                                                                                                                                                                                                                                                                                                                                                                                                                                                                                                                                                                                                                                         | Formatted ... [14] |
| The isotope composition after the mixing of the tropospheric contamination into the sample air, can be approximated with:                                                                                                                                                                                                                                                                                                                                                                                                                                                                                                                                                                                                                                                                                 | Formatted ... [15] |
| $\delta_{\text{m}} \approx \delta_{\text{s}} f_{\text{s}} + \delta_{\text{c}} f_{\text{c}}$                                                                                                                                                                                                                                                                                                                                                                                                                                                                                                                                                                                                                                                                                                               | Formatted ... [16] |
| where $\delta_{\text{m}}$ is the final isotopic composition, and $\delta_{\text{s}}$ and $\delta_{\text{c}}$ represent the isotope composition of source and contamination and $f_{\text{s}}$ and $f_{\text{c}}$ are the fractional contributions to the total number of molecules after mixing. We further define the bias of the isotopic composition measurement as                                                                                                                                                                                                                                                                                                                                                                                                                                    | Formatted ... [17] |
| $\Delta\delta = \delta_{\text{s}} - \delta_{\text{m}}$                                                                                                                                                                                                                                                                                                                                                                                                                                                                                                                                                                                                                                                                                                                                                    | Formatted ... [18] |
| Combining Eq. (8) and Eq. (9), we derive                                                                                                                                                                                                                                                                                                                                                                                                                                                                                                                                                                                                                                                                                                                                                                  | Formatted ... [19] |
| $\Delta\delta = (\delta_{\text{s}} - \delta_{\text{c}}) f_{\text{c}}$                                                                                                                                                                                                                                                                                                                                                                                                                                                                                                                                                                                                                                                                                                                                     | Formatted ... [20] |
| For the calculation, we regard the mean differences between AirCore and LISA measurements (Table 5, e.g. 0.84 ppm for $\text{CO}_2$ and 1.8 ppb for $\text{CH}_4$ ) as the upper limit of bias induced in the stratospheric samples. Another estimate is performed based on the storage test results, that showed maximum drift of 0.11 ppm $\text{CO}_2$ and 2 ppb $\text{CH}_4$ presented in Table 3.                                                                                                                                                                                                                                                                                                                                                                                                   | Formatted ... [21] |
| The fraction $f_{\text{c}}$ can be calculated according to Eq. (12) with $C_{\text{s}}$ being the typical stratospheric mole fraction, which is taken to 395 ppm for $\text{CO}_2$ and 500 ppb for $\text{CH}_4$ . We use typical tropospheric values of 405 ppm for $\text{CO}_2$ and 1800 ppb for methane. The isotopic compositions $\delta_{\text{c}}$ and $\delta_{\text{s}}$ are taken from various                                                                                                                                                                                                                                                                                                                                                                                                 | Formatted ... [22] |
|                                                                                                                                                                                                                                                                                                                                                                                                                                                                                                                                                                                                                                                                                                                                                                                                           | Formatted ... [23] |
|                                                                                                                                                                                                                                                                                                                                                                                                                                                                                                                                                                                                                                                                                                                                                                                                           | Formatted ... [24] |
|                                                                                                                                                                                                                                                                                                                                                                                                                                                                                                                                                                                                                                                                                                                                                                                                           | Formatted ... [25] |
|                                                                                                                                                                                                                                                                                                                                                                                                                                                                                                                                                                                                                                                                                                                                                                                                           | Formatted ... [26] |
|                                                                                                                                                                                                                                                                                                                                                                                                                                                                                                                                                                                                                                                                                                                                                                                                           | Formatted ... [27] |
|                                                                                                                                                                                                                                                                                                                                                                                                                                                                                                                                                                                                                                                                                                                                                                                                           | Formatted ... [28] |
|                                                                                                                                                                                                                                                                                                                                                                                                                                                                                                                                                                                                                                                                                                                                                                                                           | Formatted ... [29] |
|                                                                                                                                                                                                                                                                                                                                                                                                                                                                                                                                                                                                                                                                                                                                                                                                           | Formatted ... [30] |
|                                                                                                                                                                                                                                                                                                                                                                                                                                                                                                                                                                                                                                                                                                                                                                                                           | Formatted ... [31] |
|                                                                                                                                                                                                                                                                                                                                                                                                                                                                                                                                                                                                                                                                                                                                                                                                           | Formatted ... [32] |

references, and are presented in Table 7. The resulting bias in the isotopic composition measurements are presented in Table 7.

We can readily see that the estimated uncertainties due to the storage bias are relatively small compared to the typical analytical precisions, also presented in Table 7. Hence the LISA sampler provides a viable sampling tool for accurate measurements of stable isotopes in CO<sub>2</sub> and CH<sub>4</sub>.

## 7 Conclusions

We have developed a new lightweight stratospheric air sampler, named LISA. The LISA sampler weighs ~2.5 kg, and is designed to collect four bag samples in the stratosphere during a balloon flight for CO<sub>2</sub>, CH<sub>4</sub> and CO mole fraction measurements. Laboratory test results show that both MLF and Tedlar bags can maintain the sample mole fractions of CO<sub>2</sub>, CH<sub>4</sub> reasonably well for at least 4 hours; however, we choose the MLF bag because it outperforms the Tedlar bag in the stability of both CO and water vapour. Accounting for the storage drift and analysis uncertainty, we estimate the uncertainty of the LISA sample measurements to be 0.14 ppm for CO<sub>2</sub>, 2.3 ppb for CH<sub>4</sub> and 7.8 ppb for CO, respectively.

To assist the choice of the sampling strategy in terms of the sample vertical resolution and the sample size, we have evaluated the performance of the sampling pump in a pressure-controlled chamber. Based on the test results, we have estimated the expected sample size for each altitude and for each sampling time and found that the increase of the sample size is saturated around 200 seconds of sampling. A further increase of the sampling time would collect little additional air sample but decrease the vertical resolution.

The LISA sampler was successfully flown four times during balloon flights in Sodankylä, Finland, in April and September 2017, retrieving a total of 15 samples. The sample size ranges between 800 mL to 180 mL for the altitude between 12 km and 25 km, with the corresponding vertical resolution ranging from 0.5 to 1.5 km. The collected air samples were analysed for CO<sub>2</sub>, CH<sub>4</sub> and CO mole fractions, and evaluated against AirCore retrieved profiles, showing mean differences of 0.84 ppm for CO<sub>2</sub>, 1.8 ppb for CH<sub>4</sub> and 6.3 ppb for CO, respectively.

The LISA sampler is thus a viable low-cost tool for retrieving stratospheric air samples, providing a complementary method to AirCore. Furthermore, The LISA sampler is advantageous to perform routine stratospheric measurements of isotopic compositions of trace gases.

## Data availability

The data presented here is available on request. (huilin.chen@rug.nl)

**Deleted:** The stratospheric air samples can be used for analysis of isotopic composition measurements of trace gases. Here we take CO<sub>2</sub> and CH<sub>4</sub> as an example to estimate the uncertainties of isotopic composition measurements due to the sampling and storage errors (see Table 4). The uncertainties are calculated based on the estimated sampling and storage errors and the estimated isotopic signatures associated with the mole fraction changes of CO<sub>2</sub> and CH<sub>4</sub>.

As CO<sub>2</sub> and CH<sub>4</sub> are stable molecules, we only consider contamination of the stratospheric air samples due to the sampling and the storage. The isotope ratio after the mixing of two originally separated air parcels of source and contamination (denoted by the subscripts s and c) can be approximated with:

$$\delta_m \approx \delta_s f_s + \delta_c f_c \quad (6)$$

where  $\delta_m$  is the final isotopic composition, and  $\delta_s$  and  $\delta_c$  represent the isotope ratios of the two separated air parcels and  $f_s$  and  $f_c$  are the fractional contributions to the total mass after mixing. We further define the bias of the isotopic composition measurement as

$$\Delta\delta = \delta_s - \delta_m \quad (7)$$

Combining Eq. (6) and Eq. (7), we derive

$$\Delta\delta = (\delta_s - \delta_c) f_c \quad (8)$$

For the calculation, we regard the differences between AirCore and LISA measurements (Table 4, e.g. 0.84 ppm for CO<sub>2</sub> and 1.8 ppb for CH<sub>4</sub>) as the upper limit of the sampling and storage errors of the stratospheric samples, and take typical stratospheric CO<sub>2</sub> and CH<sub>4</sub> mole fractions of 390 ppm and 500 ppb, respectively. The fraction  $f_c$  can be calculated according to  $f_c = \frac{\text{bias}}{[X] + \text{bias}}$  where  $[X]$  is the typical mole fraction. We use typical tropospheric values for  $\delta_s$  and typical observed stratospheric values for  $\delta_c$ . The resulting bias in the isotopic composition measurements are presented in Table 6, together with typical tropospheric and stratospheric composition values used.

We can readily see that the estimated uncertainties due to the sampling and storage errors are relative small compared to the typical analytical precisions, also presented in Table 6. Hence the LISA sampler provides an excellent sampling tool for accurate measurements of stable isotopes in CO<sub>2</sub> and CH<sub>4</sub>.

**Formatted:** English (UK)

**Deleted:** 2

**Deleted:** time, and

**Deleted:** up

**Deleted:** 5

**Formatted:** English (UK)

## Acknowledgements

The authors thankfully acknowledge the help of Bert Kers, Truls Andersen, and Marc Bleeker for their help during the laboratory tests. Juha Karhu (FMI) helped with balloon launching and payload recovery which is highly appreciated. We like to thank Juha Hatakka (FMI) for maintaining the calibration gasses in Finland. This research was (in part) funded by a grant (reference number ALW-GO/15-10) from the User Support Programme Space Research. The presented AirCore flights were supported by ESA project FRM4GHG. We also acknowledge funding by the EU project RINGO, EU project GAIA-CLIM and Finnish Academy grant number 140408.

## References

- 10 Aoki, S., Nakazawa, T., Machida, T., Sugawara, S., Morimoto, S., Hashida, G., Yamanouchi, T., Kawamura, K. and Honda, H.: Carbon dioxide variations in the stratosphere over Japan, Scandinavia and Antarctica, *Tellus, Ser. B Chem. Phys. Meteorol.*, 55(2), 178–186, doi:10.1034/j.1600-0889.2003.00059.x, 2003.
- Baldwin, M. P., Dameris, M. and Shepherd, T. G.: How will the stratosphere affect climate change?, *Science* (80-. ), 316(5831), 1576–1577, doi:10.1126/science.1144303, 2007.
- Beghi, S. and Guillot, J. M.: Sample water removal method in volatile organic compound analysis based on diffusion through poly(vinyl fluoride) film, *J. Chromatogr. A*, 1127(1–2), 1–5, doi:10.1016/j.chroma.2006.05.102, 2006.
- Bergamaschi, P., Lowe, D. C., Manning, M. R., Moss, R., Bromley, T. and Clarkson, T. S.: Transects of atmospheric CO<sub>2</sub>, CH<sub>4</sub>, and their isotopic composition across the Pacific: Shipboard measurements and validation of inverse models, *J. Geophys. Res. Atmos.*, 106(D8), 7993–8011, doi:10.1029/2000JD900576, 2001.
- Butchart, N.: The Brewer-Dobson circulation, *Rev. Geophys.*, 52(2), 157–184, doi:10.1002/2013RG000448, 2014.
- 25 Cariou, S. and Guillot, J. M.: Double-layer Tedlar bags: A means to limit humidity evolution of air samples and to dry humid air samples, *Anal. Bioanal. Chem.*, 384(2), 468–474, doi:10.1007/s00216-005-0177-4, 2006.
- Chen, H., Karion, A., Rella, C. W., Winderlich, J., Gerbig, C., Filges, A., Newberger, T., Sweeney, C. and Tans, P. P.: Accurate measurements of carbon monoxide in humid air using the cavity ring-down spectroscopy (CRDS) technique, *Atmos. Meas. Tech.*, 6(4), 1031–1040, doi:10.5194/amt-6-1031-2013, 2013.
- 30 Chen, H., Kivi, R., Heikkinen, P., Kers, B. A. M., de Vries, M., Hatakka, J., Laurila, T., Sweeney, C. and Tans, P. P.: High-latitude balloon observations of CO<sub>2</sub>/CH<sub>4</sub>/CO using AirCore: evaluation of Sodankylä TCCON retrievals, *Atmos. Meas. Tech. prep*, 2018.
- 35 Crevoisier, C., Nobileau, D., Armante, R., Crépeau, L., Machida, T., Sawa, Y., Matsueda, H., Schuck, T.,

Field Code Changed

Formatted: English (UK)

- Thonat, T., Pernin, J., Scott, N. A. and Chédin, A.: The 2007-2011 evolution of tropical methane in the mid-troposphere as seen from space by MetOp-A/IASI, *Atmos. Chem. Phys.*, 13(8), 4279–4289, doi:10.5194/acp-13-4279-2013, 2013.
- Daube, J. C., Boering, K. A., Andrews, A. E. and Wofsy, S. C.: A high-precision fast-response airborne CO<sub>2</sub> analyzer for in situ sampling from the surface to the middle stratosphere, *J. Atmos. Ocean. Technol.*, 19(10), 1532–1543, doi:10.1175/1520-0426(2002)019<1532:AHPFRA>2.0.CO;2, 2002.
- Dirksen, R. J., Sommer, M., Immler, F. J., Hurst, D. F., Kivi, R. and Vömel, H.: Reference quality upper-air measurements: GRUAN data processing for the Vaisala RS92 radiosonde, *Atmos. Meas. Tech.*, 7(12), 4463–4490, doi:10.5194/amt-7-4463-2014, 2014.
- 10 Ehhalt, D. H., Röth, E. P. and Schmidt, U.: On the temporal variance of stratospheric trace gas concentrations, *J. Atmos. Chem.*, 1(1), 27–51, doi:10.1007/BF00113978, 1983.
- Engel, A.: Temporal development of total chlorine in the high-latitude stratosphere based on reference distributions of mean age derived from CO<sub>2</sub> and SF<sub>6</sub>, *J. Geophys. Res.*, 107(D12), 4136, doi:10.1029/2001JD000584, 2002.
- 15 Engel, A., Möbius, T., Bönisch, H., Schmidt, U., Heinz, R., Levin, I., Atlas, E., Aoki, S., Nakazawa, T., Sugawara, S., Moore, F., Hurst, D., Elkins, J., Schauffler, S., Andrews, A. and Boering, K.: Age of stratospheric air unchanged within uncertainties over the past 30 years, *Nat. Geosci.*, 2(1), 28–31, doi:10.1038/ngeo388, 2009.
- Engel, A., Bönisch, H., Schwarzenberger, T., Haase, H. P., Grunow, K., Abalichin, J. and Sala, S.: Long-term validation of ESA operational retrieval (version 6.0) of MIPAS Envisat vertical profiles of methane, nitrous oxide, CFC11, and CFC12 using balloon-borne observations and trajectory matching, *Atmos. Meas. Tech.*, 9(3), 1051–1062, doi:10.5194/amt-9-1051-2016, 2016.
- 20 Engel, A., Bönisch, H., Ullrich, M., Sitals, R., Membrive, O., Danis, F. and Crevoisier, C.: Mean age of stratospheric air derived from AirCore observations, *Atmos. Chem. Phys.*, 17(11), 6825–6838, doi:10.5194/acp-17-6825-2017, 2017.
- 25 Fabian, P.: Atmospheric sampling, *Adv. Sp. Res.*, 1(11), 17–27, doi:10.1016/0273-1177(81)90444-0, 1981.
- Frankenberg, C., Aben, I., Bergamaschi, P., Dlugokencky, E. J., Van Hees, R., Houweling, S., Van Der Meer, P., Snel, R. and Tol, P.: Global column-averaged methane mixing ratios from 2003 to 2009 as derived from SCIAMACHY: Trends and variability, *J. Geophys. Res. Atmos.*, 116(4), 1–12, doi:10.1029/2010JD014849, 2011.
- 30 Fuke, H., Iijima, I., Izutsu, N., Matsuzaka, Y., Kato, Y., Kakehashi, Y., Shoji, Y., Yoshida, T., Honda, H., Aoki, S., Inai, Y. and Morimoto, S.: Balloon Launch and Flight Operation from the Research Vessel Hakuho Maru for Stratospheric Air Sampling over the Eastern Pacific Equator, *J. Atmos. Ocean. Technol.*, 31(7), 1540–1548, doi:10.1175/JTECH-D-13-00248.1, 2014.
- 35 Gerber, E. P., Butler, A., Calvo, N., Charlton-Perez, A., Giorgetta, M., Manzini, E., Perlwitz, J., Polvani, L. M., Sassi, F., Scaife, A. A., Shaw, T. A., Son, S. W. and Watanabe, S.: Assessing and understanding

- the impact of stratospheric dynamics and variability on the earth system, *Bull. Am. Meteorol. Soc.*, 93(6), 845–859, doi:10.1175/BAMS-D-11-00145.1, 2012.
- Greatwood, C., Richardson, T. S., Freer, J., Thomas, R. M., Rob Mackenzie, A., Brownlow, R., Lowry, D., Fisher, R. E. and Nisbet, E. G.: Atmospheric sampling on ascension island using multirotor UAVs, *Sensors (Switzerland)*, 17(6), 1189, doi:10.3390/s17061189, 2017.
- Holton, J. R., Haynes, P. H., McIntyre, M. E., Douglass, A. R., Rood, R. B. and Pfister, L.: Stratosphere-troposphere exchange, *Rev. Geophys.*, 33(4), 403–439, doi:10.1029/95RG02097, 1995.
- Honda, H.: Development of stratospheric whole air sampling system using LHe as a cryogen and its operation results for 15 years, *Adv. Sp. Res.*, 33(10), 1797–1805, doi:10.1016/j.asr.2003.08.029, 2004.
- 10 Honeywell: HSCMAND015PASA5, [online] Available from: <https://sensing.honeywell.com/hscmand015pasa5-amplified-board-mount-pressure-sensors> (Accessed 13 November 2017), n.d.
- Kaiser, J., Engel, A., Borchers, R. and Röckmann, T.: Probing stratospheric transport and chemistry with new balloon and aircraft observations of the meridional and vertical N<sub>2</sub>O isotope distribution, *Atmos. Chem. Phys.*, 6(11), 3535–3556, doi:10.5194/acpd-6-4273-2006, 2006.
- 15 Karion, A., Sweeney, C., Tans, P. and Newberger, T.: AirCore: An innovative atmospheric sampling system, *J. Atmos. Ocean. Technol.*, 27(11), 1839–1853, doi:10.1175/2010JTECHA1448.1, 2010.
- Kivi, R. and Heikkinen, P.: Fourier transform spectrometer measurements of column CO<sub>2</sub> at Sodankylä, Finland, *Geosci. Instrumentation, Methods Data Syst.*, 5(2), 271–279, doi:10.5194/gi-5-271-2016, 2016.
- 20 Laube, J. C., Engel, A., Bönisch, H., Möbius, T., Sturges, W. T., Braß, M. and Röckmann, T.: Fractional release factors of long-lived halogenated organic compounds in the tropical stratosphere, *Atmos. Chem. Phys.*, 10(3), 1093–1103, doi:10.5194/acp-10-1093-2010, 2010.
- Lueb, R. A., Ehhalt, D. H. and Heidt, L. E.: Balloon-borne low temperature air sampler, *Rev. Sci. Instrum.*, 46(6), 702–705, doi:10.1063/1.1134292, 1975.
- 25 Membrive, O., Crevoisier, C., Sweeney, C., Danis, F., Hertzog, A., Engel, A., Bönisch, H. and Picon, L.: AirCore-HR: A high-resolution column sampling to enhance the vertical description of CH<sub>4</sub> and CO<sub>2</sub>, *Atmos. Meas. Tech.*, 10(6), 2163–2181, doi:10.5194/amt-10-2163-2017, 2017.
- Morimoto, S., Yamanouchi, T., Honda, H., Iijima, I., Yoshida, T., Aoki, S., Nakazawa, T., Ishidoya, S. and Sugawara, S.: A New Compact Cryogenic Air Sampler and Its Application in Stratospheric Greenhouse Gas Observation at Syowa Station, Antarctica, *J. Atmos. Ocean. Technol.*, 26(10), 2182–2191, doi:10.1175/2009JTECHA1283.1, 2009.
- 30 Mrozek, D. J., Van Der Veen, C., Hofmann, M. E. G., Chen, H., Kivi, R., Heikkinen, P. and Röckmann, T.: Stratospheric Air Sub-sampler (SAS) and its application to analysis of I<sup>17</sup>O(CO<sub>2</sub>) from small air samples collected with an AirCore, *Atmos. Meas. Tech.*, 9(11), 5607–5620, doi:10.5194/amt-9-5607-2016, 2016.
- 35 Nakazawa, T., Machida, T., Sugawara, S., Murayama, S., Morimoto, S., Hashida, G., Honda, H. and Itoh,

- T.: Measurements of the stratospheric carbon dioxide concentration over Japan using a Balloon-borne cryogenic sampler, *Geophys. Res. Lett.*, 22(10), 1229–1232, doi:10.1029/95GL01188, 1995.
- Nakazawa, T., Aoki, S., Kawamura, K., Saeki, T., Sugawara, S., Honda, H., Hashida, G., Morimoto, S., Yoshida, N., Toyoda, S., Makide, Y. and Shirai, T.: Variations of stratospheric trace gases measured using a balloon-borne cryogenic sampler, *Adv. Sp. Res.*, 30(5), 1349–1357, doi:10.1016/S0273-1177(02)00551-3, 2002.
- Nisbet, E. G., Dlugokencky, E. J., Manning, M. R., Lowry, D., Fisher, R. E., France, J. L., Michel, S. E., Miller, J. B., White, J. W. C., Vaughn, B., Bousquet, P., Pyle, J. A., Warwick, N. J., Cain, M., Brownlow, R., Zazzeri, G., Lanoisellé, M., Manning, A. C., Gloor, E., Worthy, D. E. J., Brunke, E. G., Labuschagne, C., Wolff, E. W. and Ganesan, A. L.: Rising atmospheric methane: 2007–2014 growth and isotopic shift, *Global Biogeochem. Cycles*, 30(9), 1356–1370, doi:10.1002/2016GB005406, 2016.
- Paul, D., Chen, H., Been, H. A., Kivi, R. and Meijer, H. A. J.: Radiocarbon analysis of stratospheric CO<sub>2</sub> retrieved from AirCore sampling, *Atmos. Meas. Tech.*, 9(10), 4997–5006, doi:10.5194/amt-9-4997-2016, 2016.
- 15 Plumb, R. A.: Stratospheric Transport, *J. Meteorol. Soc. Japan. Ser. II*, 80(4B), 793–809, doi:10.2151/jmsj.80.793, 2002.
- Plumb, R. A.: Tracer interrelationships in the stratosphere, *Rev. Geophys.*, 45(4), 1–33, doi:10.1029/2005RG000179, 2007.
- Rella, C. W., Chen, H., Andrews, A. E., Filges, A., Gerbig, C., Hatakka, J., Karion, A., Miles, N. L., Richardson, S. J., Steinbacher, M., Sweeney, C., Wastine, B. and Zellweger, C.: High accuracy measurements of dry mole fractions of carbon dioxide and methane in humid air, *Atmos. Meas. Tech.*, 6(3), 837–860, doi:10.5194/amt-6-837-2013, 2013.
- Rice, A. L.: Carbon and hydrogen isotopic compositions of stratospheric methane: 1. High-precision observations from the NASA ER-2 aircraft, *J. Geophys. Res.*, 108(D15), 4460, doi:10.1029/2002JD003042, 2003.
- 25 Röckmann, T., Brass, M., Borchers, R. and Engel, A.: The isotopic composition of methane in the stratosphere: High-altitude balloon sample measurements, *Atmos. Chem. Phys.*, 11(24), 13287–13304, doi:10.5194/acp-11-13287-2011, 2011.
- Schmidt, U., Kulesa, G., Klein, E., Röth, E. P., Fabian, P. and Borchers, R.: Intercomparison of balloon-borne cryogenic whole air samplers during the MAP/GLOBUS 1983 campaign, *Planet. Space Sci.*, 35(5), 647–656, doi:10.1016/0032-0633(87)90131-0, 1987.
- 30 Sugawara, S., Nakazawa, T., Shirakawa, Y., Kawamura, K., Aoki, S., Machida, T. and Honda, H.: Vertical profile of the carbon isotopic ratio of stratospheric methane over Japan, *Geophys. Res. Lett.*, 24(23), 2989–2992, doi:10.1029/97GL03044, 1997.
- 35 Trolter, M., White, J. W. C., Tans, P. P., Masarie, K. A. and Gemery, P. A.: Monitoring the isotopic composition of atmospheric CO<sub>2</sub>: Measurements from the NOAA Global Air Sampling Network, *J. Geophys. Res. Atmos.*, 101(D20), 25897–25916, doi:10.1029/96JD02363, 1996.

Vaisala: Vaisala Radiosonde RS92-SGP, [online] Available from: [http://www.vaisala.com/Vaisala/Documents/Brochures\\_and\\_Datasheets/RS92SGP-Datasheet-B210358EN-F-LOW.pdf](http://www.vaisala.com/Vaisala/Documents/Brochures_and_Datasheets/RS92SGP-Datasheet-B210358EN-F-LOW.pdf) (Accessed 19 January 2018), 2013.

Wunch, D., Toon, G. C., Blavier, J.-F. L., Washenfelder, R. A., Notholt, J., Connor, B. J., Griffith, D. W.  
5 T., Sherlock, V. and Wennberg, P. O.: The Total Carbon Column Observing Network, *Philos. Trans. R. Soc. A Math. Phys. Eng. Sci.*, 369(1943), 2087–2112, doi:10.1098/rsta.2010.0240, 2011.

10

15

20



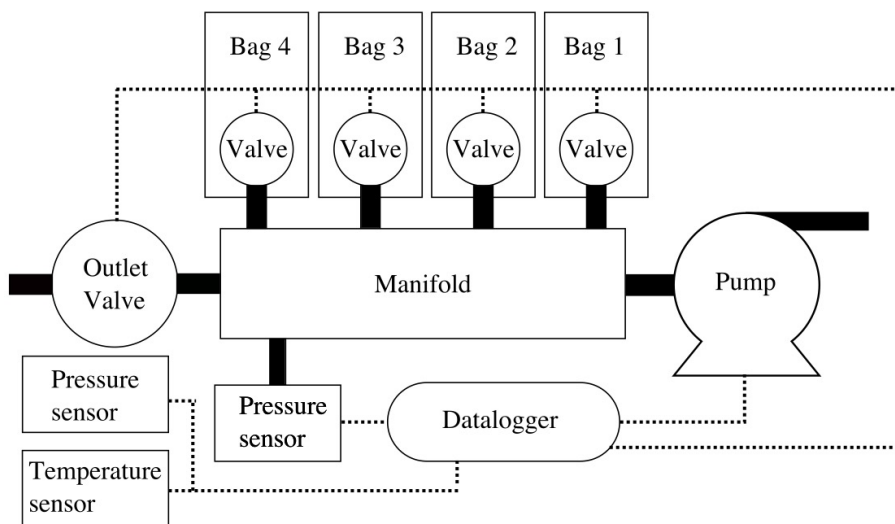

Figure 1: A schematic diagram of the sampler. Four bags are connected to a custom-made manifold. A small servomotor operates the screw cap combo valve. The outlet valve is the same as that of the bags, but is normally open when the sampler is idle during flight, allowing air pressure to equilibrate with outside air. Pressure inside the manifold is monitored by a pressure sensor. A datalogger is used to control all of the electronics. Electric connections are shown with dashed lines.

Table 1: Components used in the LIS sampler, including manufacturer and product key. The total weight is given for amounts per part. Voltage and power are presented according to manufacturer specification. The total weight for the onboard computer and sensors is given.

| Component          | Company     | Product key        | Amount | Voltage (V) | Power (W) | Weight (g) |
|--------------------|-------------|--------------------|--------|-------------|-----------|------------|
| Servo motor        | Hitec       | HS-65HB+           | 5      | 4.8-6       | 1.32      | 91         |
| Pump               | KNF         | NMP 850.1.2 KNDC B | 1      | 24          | 10.8      | 403.6      |
| Bag (MLF)          | Supelco     | 30227-U            | 4      | (-)         | (-)       | 80.4       |
| Tube               | Cole Palmer | EW-95100-02        | 1      | (-)         | (-)       | 30         |
| Union T            | Swagelok    | NY-400-3           | 5      | (-)         | (-)       | 39         |
| Union Knee         | Swagelok    | NY-400-9           | 5      | (-)         | (-)       | 33         |
| Battery            | (-)         | CR123              | 10     | 3           | (-)       | 166        |
| Pressure sensor    | Honeywell   | HSCMAND01SPASA5    | 2      |             |           |            |
| Temperature sensor | IST         | 600C (100Ohm)      | 1      | 7-12        | (-)       | 87.4       |
| Datalogger         | Arduino     | Mega 2560          | 1      |             |           |            |
| Battery Casing     | TruPower    | BH-CR123A          | 10     | (-)         | (-)       | 68.8       |

Formatted: Font: 10 pt

5

1. 
2. 
3. 
4. 
5. 
6. 
7. 

Deleted: 1

**Formatted:** Font: 10 pt

**Deleted:** s

**Formatted:** Font: 10 pt

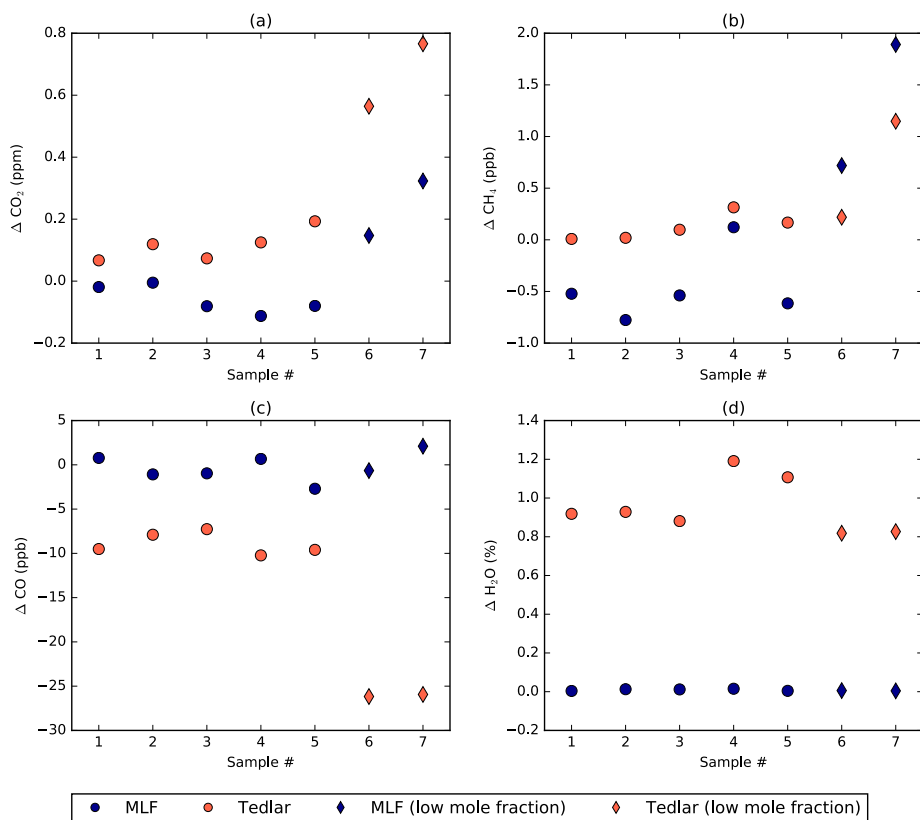

Figure 2: The observed drift of the mole fractions of  $\text{CO}_2$  (a),  $\text{CH}_4$  (b),  $\text{CO}$  (c) and  $\text{H}_2\text{O}$  (d) in each of 7 samples in both Tedlar and MLF bags. The drift is defined as the difference between the measured mole fractions after 4 hours and those measured immediately after filling. For  $\text{CO}_2$ , the mole fractions of samples nos. 1-5 are representative for stratospheric mole fractions. Samples nos. 6&7 contain low mole fractions and represent a typical mole fraction of stratospheric  $\text{CH}_4$ .

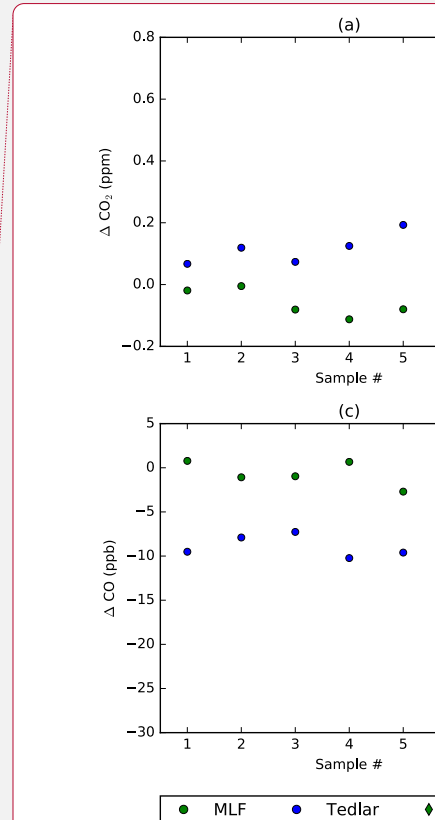

Deleted:

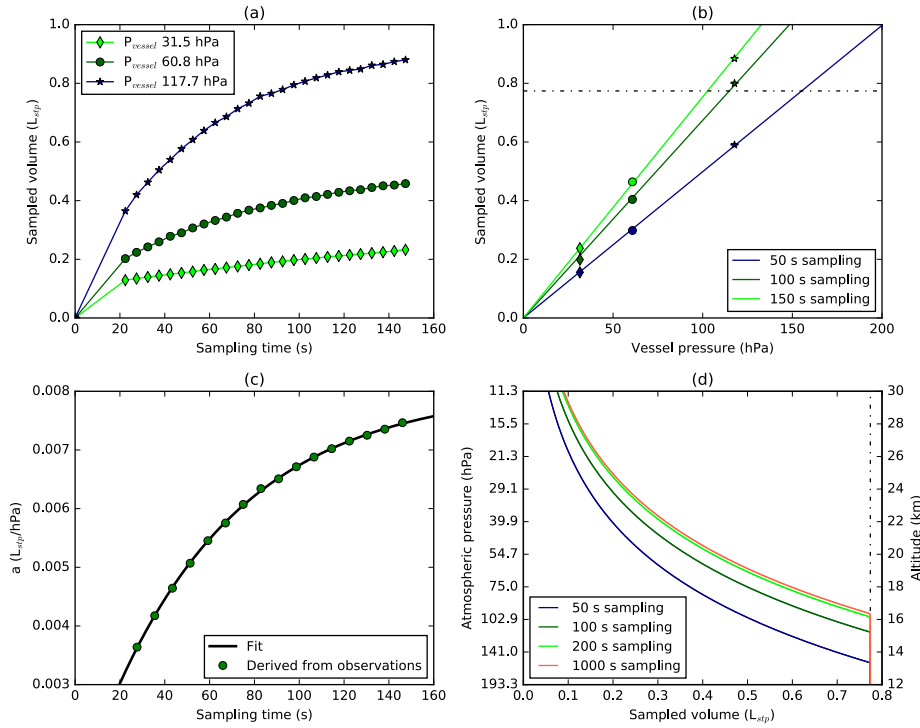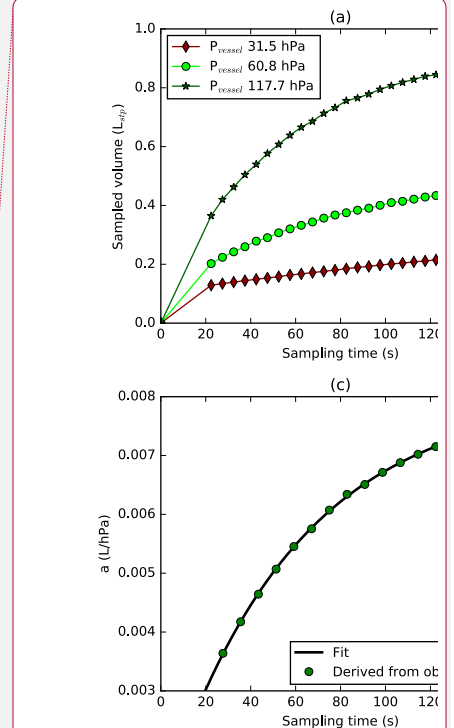

Deleted:

Deleted: 6

Figure 3 a) Sample volume as a function of the sampling time in seconds. The first  $19.7 \pm 0.3$  seconds fill the bag up to the pressure in the vessel. The sampled volume in the first 19.7 seconds linearly interpolated starting at zero, e.g. assuming that sampled volume increases linear with time. After the first 19.7 seconds, the bag is not expanding and air needs to be compressed and the flow rate drops. b) Sampled volume in litre at STP as a function of chamber pressure (markers correspond to those presented in 3a). The sampling times of 50 seconds, 100 seconds and 150 seconds are arbitrarily chosen. The lines are a linear fit to the data as in Eq. (1). For a given sampling time, the sampled amount at STP decreases linear with vessel pressure. The bags cannot withstand a pressure difference larger than 300 hPa. The practical limit is presented with a black dashed line. c) The slope  $a(t)$  (Eq. (1)) as a function of sampling time. The data points are derived values of  $(t)$  from the pressure data and the black line is the applied fit to the data, according to Eq. (2), with  $t_0 = 19.7$  seconds. The fit constants can be found in Table 2. d) Atmospheric pressure on the left and corresponding altitude on the right, as a function of modelled sampled volume. Note that for atmospheric pressure  $> 120$  and  $< 30$  hPa, as well as for sampling time  $> 150$  the depicted model relies on extrapolation of the observations. The International Standard Atmosphere is used to link pressure and altitude. The cut-off at the sample size of  $0.77 L_{atm}$  is due to the practical fill limit of 300 hPa which consequently means that the sampling time is less. The uncertainty in volume presented in a and b is  $7.6 \text{ mL}_{atm}$ .

**Table 3: Uncertainty based on the different error sources for CO<sub>2</sub>, CH<sub>4</sub> and CO. The total uncertainty is calculated using Gaussian error propagation. <sup>1</sup>The dead volume bias is estimated using a dead volume of 1.5 mL<sub>stp</sub>, which prior to sampling is assumed to be at 50 hPa and 220 K. This volume might remain unflushed, hence the air is of tropospheric origin, with concentrations of 400 ppm CO<sub>2</sub>, 1800 ppb CH<sub>4</sub> and 150 ppb CO. The total sample volume is 200 mL<sub>stp</sub> and has mole fractions of 395 ppm CO<sub>2</sub>, 500 ppb CH<sub>4</sub> and 30 ppb CO. The bias is then calculated as the resulting deviation after mixing.**

| Source                   | CO <sub>2</sub> | CH <sub>4</sub> | CO    |
|--------------------------|-----------------|-----------------|-------|
| Analyser                 | 0.04            | 0.2             | 7     |
| Calibration transfer     | 0.07            | 1               | 2     |
| Dead volume <sup>1</sup> | 0.002           | 0.605           | 0.056 |
| Storage drift            | 0.11            | 2.0             | 2.7   |
| Total                    | 0.14            | 2.3             | 7.8   |

**Table 4: Preset sampling parameters. Sampling is completed after either the maximum pressure in the manifold or the maximum sampling time is reached. P1-P4 are the preset targeted pressure altitudes.**

| Date        | Maximum sampling time (s) | Maximum pressure (hPa) | P1 (hPa) | P2 (hPa) | P3 (hPa) | P4 (hPa) |
|-------------|---------------------------|------------------------|----------|----------|----------|----------|
| 26-Apr-2017 | 250                       | 250                    | 200      | 150      | 100      | 50       |
| 04-Sep-2017 | 180                       | 275                    | 200      | 150      | 100      | 50       |
| 05-Sep-2017 | 220                       | 280                    | 170      | 120      | 80       | 30       |
| 06-Sep-2017 | 250                       | 280                    | 170      | 120      | 80       | 50       |

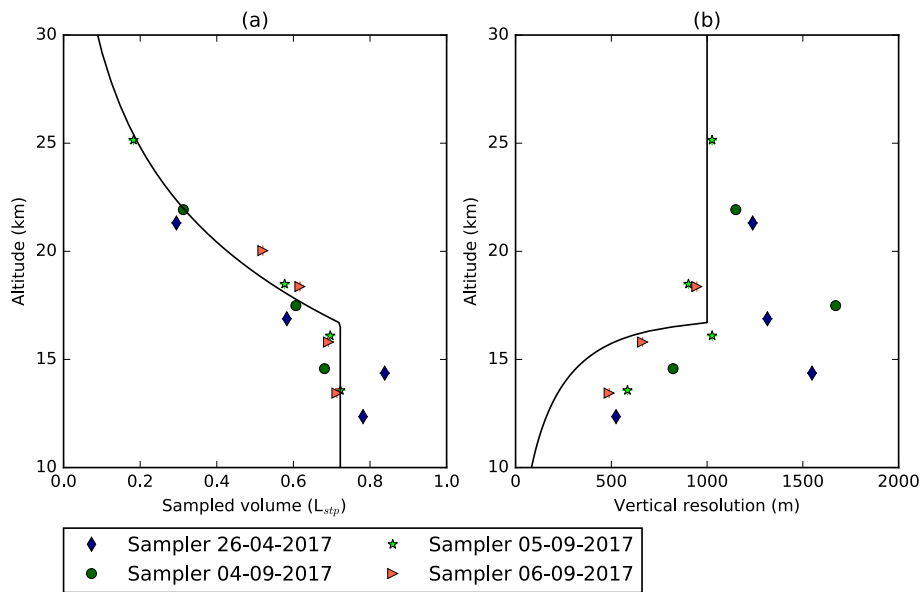

Figure 4: a) The altitude profile of the sample size of the collected 15 air samples. The estimated sample size with the sampling time of 200 seconds, and a maximum allowed bag pressure of 280 hPa, using the empirical relations used in Section 4 is shown in blue line, the same as in Fig. 3d. The uncertainty in volume presented is 7.6 mL. b) The altitude profile of the vertical resolution of the collected samples. Different colours and symbols are used to label the samples from different flights. The vertical resolution of the highest sample from the flight on 6 September 2017 is not shown as the number is abnormally large caused by fast descending speed after the burst of the balloon. The black solid line shows the expected vertical resolution, assuming an ascent speed of 5 m s<sup>-1</sup>. Sampling time is calculated using the empirical relations discussed in Section 4, with a maximum allowed pressure of 280 hPa. If this is not reached we have used the maximum sampling time of 200 seconds, which corresponds to a vertical resolution of 1 km.

Table 5: Comparison of CO<sub>2</sub>, CH<sub>4</sub> and CO mole fractions between AirCore and LISA measurements. The difference is calculated as AirCore – LISA. The correlation coefficient between LISA and averaged AirCore is also presented. \*Excluding the April 26 flight

| Species               | Mean±σ     | R <sup>2</sup> | Mean±σ <sup>*</sup> | R <sup>2</sup> <sup>*</sup> |
|-----------------------|------------|----------------|---------------------|-----------------------------|
| CO <sub>2</sub> (ppm) | -0.84±0.47 | 0.93           | -0.55±0.13          | 0.97                        |
| CH <sub>4</sub> (ppb) | -1.8±16.2  | 0.99           | 5.1±13.1            | 0.99                        |
| CO (ppb)              | 6.3±6.6    | 0.58           | 9.2±5.2             | 0.59                        |

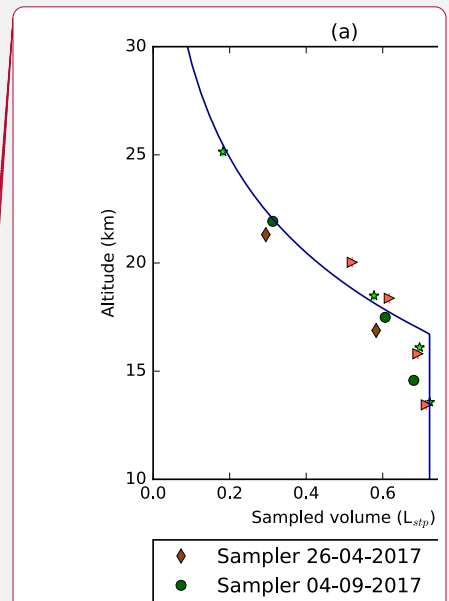

Figure 4: a) The altitude profile of the sample size of the collected 15 air samples. The estimated sample size with the sampling time of 200 seconds, and a maximum allowed bag pressure of 280 hPa, using the empirical relations used in Section 4 is shown in blue line, the same as in Fig. 3d. The uncertainty in volume presented is 7.6 mL.

Deleted: 4  
Formatted: ... [35]  
Formatted: ... [36]  
Deleted: (excluding the April 26 flight)  
Formatted: Font: 10 pt  
Deleted: (excluding the April 26 flight)  
Formatted: Font: 10 pt  
Formatted: Font: 10 pt  
Formatted: Font: 10 pt  
Formatted: Font: 10 pt  
Deleted: 0...16.216 ... [37]  
Deleted: 0  
Formatted: Font: 10 pt  
Deleted: 4...6.658 ... [38]  
Deleted: 19...5.218 ... [39]

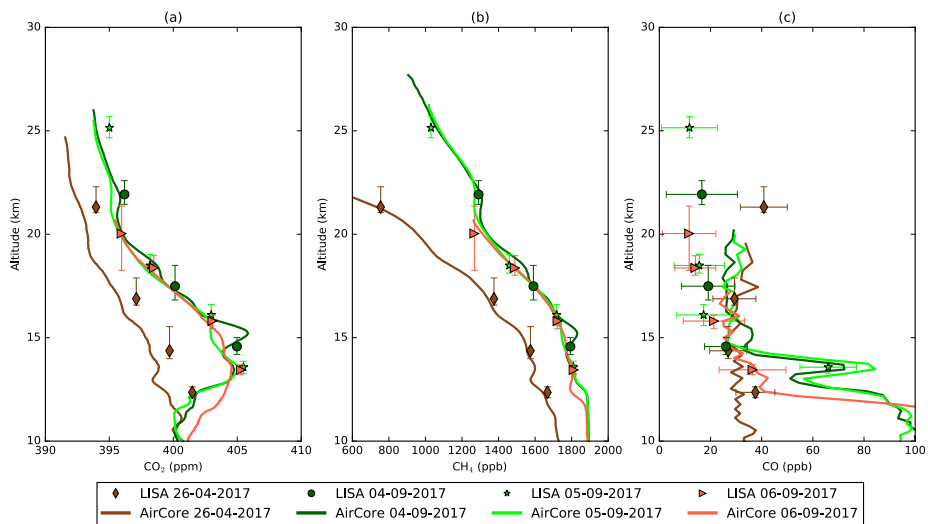

Figure 5: Comparison of AirCore and LISA measurements of (a)  $\text{CO}_2$ , (b)  $\text{CH}_4$  and (c)  $\text{CO}$  mole fractions. The AirCore  $\text{CO}$  profiles are averaged in 100 m bins to smooth the relatively large noise of the measurements due to the analytical precision of 7 ppb ( $1\sigma$ ) of the CRDS analyser. Different colours and symbols are used to label the samples from different flights shown in the legend.

5

10

15

29



**Table 6:** Comparison of the vertical resolution and sample size between the LISA sampler and samples sampled from AirCore. References: A Mrozek et al., 2016; B Paul et al., 2016; C this study.

| Altitude (km) | Method  | Resolution (m) | Sample size (mL) | Reference |
|---------------|---------|----------------|------------------|-----------|
| 12            | AirCore | 800            | 25               | A         |
|               | AirCore | 1000           | 50               | B         |
|               | LISA    | 580            | 720              | C         |
| 15            | AirCore | 1500           | 25               | A         |
|               | AirCore | 2000           | 50               | B         |
|               | LISA    | 820            | 680              | C         |
| 20            | AirCore | 2000           | 25               | A         |
|               | AirCore | 3000           | 50               | B         |
|               | LISA    | 1100           | 312              | C         |
| 25            | AirCore | 3000           | 25               | A         |
|               | AirCore | 5000           | 50               | B         |
|               | LISA    | 1000           | 182              | C         |

Deleted: 5

Field Code Changed

... [40]

Formatted: Font: 10 pt

**Table 7:** Expected bias in stable isotope measurements on samples obtained by LISA, due to the limited accuracy of the LISA sampler. Typical values for the troposphere and stratosphere are taken from the indicated references: A) (Troler et al., 1996) B) (Mrozek et al., 2016) C) (Nisbet et al., 2016) D) (Bergamaschi et al., 2001) E) (Aoki et al., 2003) and F) (Röckmann et al., 2011). Reported measurement reproducibility's, Re, for stratospheric air are also provided.  $\delta^{13}C$  and  $\delta^{18}O$  values are with respect to Vienna Pee Dee Belemnite (VPDB) and  $\Delta^{17}O$  and  $\delta^2H$  are with respect to Vienna Standard Mean Ocean Water (VSMOW).  $f_c$  was calculated using a source value 395 ppm ( $CO_2$ ) and 500 ppb ( $CH_4$ ). For  $f_{c1}$  contamination values of 0.84 ppm ( $CO_2$ ) and 1.8 ppb ( $CH_4$ ) based on LISA AirCore observed mean bias, resulting in  $\Delta\delta_1$ ; For  $f_{c2}$  the maximum observed drift (Fig. 2) of 0.11 ppm ( $CO_2$ ) and 2 ppb ( $CH_4$ ) are used, resulting in  $\Delta\delta_2$ .

| Species                           | $\delta_s$ (‰) | $\delta_s$ (‰) | Re (‰)   | LISA-AirCore |                        | Storage drift |                        |
|-----------------------------------|----------------|----------------|----------|--------------|------------------------|---------------|------------------------|
|                                   |                |                |          | $f_{c1}$     | $ \Delta\delta_1 $ (‰) | $f_{c2}$      | $ \Delta\delta_2 $ (‰) |
| $\delta^{13}C$ ( $CO_2$ ) (VPDB)  | -7.5 (A)       | -8.4 (E)       | 0.02 (E) |              | 0.077                  |               | 0.010                  |
| $\delta^{18}O$ ( $CO_2$ ) (VPDB)  | -2 (A)         | 12 (E)         | 0.05 (E) | 0.086        | 1.203                  | 0.011         | 0.158                  |
| $\Delta^{17}O$ ( $CO_2$ ) (VSMOW) | 0 (B)          | 7 (B)          | 0.2 (B)  |              | 0.602                  |               | 0.079                  |
| $\delta^{13}C$ ( $CH_4$ ) (VPDB)  | -47 (C)        | -20 (F)        | 0.7 (F)  | 0.006        | 0.134                  | 0.006         | 0.149                  |
| $\delta^2H$ ( $CH_4$ ) (VSMOW)    | -85 (D)        | 190 (F)        | 2.3 (F)  |              | 1.366                  |               | 1.517                  |

Field Code Changed

... [54]

Deleted: Table 6: Expected bias due to the limited accuracy of the LISA sampler. Typical values for the troposphere and stratosphere are taken from the indicated references: A) (Troler et al., 1996) B) (Mrozek et al., 2016) C) (Nisbet et al., 2016) D) (Bergamaschi et al., 2001) E) (Aoki et al., 2003) and F) (Röckmann et al., 2011).  $f_c$  was calculated using a source value 390 ppm ( $CO_2$ ) and 1000 ppb ( $CH_4$ ); contamination values of 0.55 ppm ( $CO_2$ ) and 5.1 ppb ( $CH_4$ ). Reported measurement reproducibility's for stratospheric air are also provided. Measurement Reproducibility (‰)

... [41]

Formatted: Font: 10 pt, English (UK)

Formatted

... [43]

Formatted

... [44]

Formatted

... [45]

Formatted

... [46]

Formatted

... [47]

Formatted

... [48]

Formatted: Font: 10 pt, English (UK)

Formatted

... [42]

Formatted

... [49]

Formatted: English (UK)

Formatted

... [50]

Formatted

... [51]

Formatted

... [52]

Formatted

... [53]

Deleted: 1

Nevertheless, a significant number of stratospheric air samples have been collected with remarkable scientific efforts. Several campaigns have been performed and corresponding results have been used in many studies of the stratospheric chemistry and physics. Laube et al., 2010, presented several profiles of halocarbons, relevant to stratospheric ozone depletion and the mean age of air. The mean age of air, a good tracer for atmospheric transport time scales, was also assessed based on SF<sub>6</sub> and CO<sub>2</sub> measurements performed on cryogenically retrieved samples (Engel, 2002). Long-term monitoring of CO<sub>2</sub>, CH<sub>4</sub>, N<sub>2</sub>O and various halocarbons and isotopic analysis of CO<sub>2</sub>, CH<sub>4</sub>, N<sub>2</sub>O have been performed annually for more than a decade (Aoki et al., 2003; Nakazawa et al., 1995, 2002). The stratospheric distribution of methane and its stable isotopes have been performed in order to understand the stratospheric methane sink (Rice, 2003; Röckmann et al., 2011; Sugawara et al., 1997). The stratospheric distribution of N<sub>2</sub>O and their position dependent isotopic compositions were determined (Kaiser et al., 2006) and were subsequently used to validate transport models. Engel et al., 2006, reported the observed mesospheric air in polar vortex, improving our understanding of transport in the middle atmosphere. Moreover

, these campaigns are essential to validation and comparison of satellite retrievals (e.g. Engel et al., 2016; Stiller et al., 2007).

Trace gas distributions provide a useful tool to obtain an insight in transport properties and chemistry of the stratosphere. (Brenninkmeijer et al., 1995) studied the correlation of CO<sub>2</sub>, CH<sub>4</sub> and CO mole fractions and their isotopic composition measurements, and found a high correlation between mole fractions and isotopic compositions. It was shown that the <sup>13</sup>C and <sup>2</sup>H isotopic composition of stratospheric CH<sub>4</sub> is strongly correlated with its mole fractions (Röckmann et al., 2011) and similar findings were presented for N<sub>2</sub>O (Kaiser et al., 2006). A theoretical explanation to the tracer-tracer relations due to rapid mixing of air along isentropic surfaces in the stratosphere was presented by (Plumb, 2007).

Stratospheric tracer observations are essential for validation of General Circulation Models (GCM's). The stratospheric meridional overturning, or the Brewer-Dobson circulation (BDC) was predicted to increase in strength from modelling studies (Butchart, 2014). The mean age of stratospheric air samples was shown to be a good diagnostic for the strength of the BDC and detected no significant change in the strength of the BDC (Engel et al., 2009, 2017). In spite of all the efforts to make observations of stratospheric tracers, GCM's remain poorly constrained, a problem already pointed out several decades ago (Ehhalt et al., 1983).

Underline, English (UK)

Underline, English (UK)

Underline, English (UK)

|                               |                       |                           |
|-------------------------------|-----------------------|---------------------------|
| <b>Page 16: [4] Formatted</b> | <b>Joram Hooghiem</b> | <b>7/13/18 4:42:00 PM</b> |
| Underline, English (UK)       |                       |                           |
| <b>Page 16: [4] Formatted</b> | <b>Joram Hooghiem</b> | <b>7/13/18 4:42:00 PM</b> |
| Underline, English (UK)       |                       |                           |
| <b>Page 16: [4] Formatted</b> | <b>Joram Hooghiem</b> | <b>7/13/18 4:42:00 PM</b> |
| Underline, English (UK)       |                       |                           |
| <b>Page 16: [5] Formatted</b> | <b>Joram Hooghiem</b> | <b>7/13/18 4:42:00 PM</b> |
| Underline, English (UK)       |                       |                           |
| <b>Page 16: [5] Formatted</b> | <b>Joram Hooghiem</b> | <b>7/13/18 4:42:00 PM</b> |
| Underline, English (UK)       |                       |                           |
| <b>Page 16: [5] Formatted</b> | <b>Joram Hooghiem</b> | <b>7/13/18 4:42:00 PM</b> |
| Underline, English (UK)       |                       |                           |
| <b>Page 16: [6] Formatted</b> | <b>Joram Hooghiem</b> | <b>7/13/18 4:42:00 PM</b> |
| Underline, English (UK)       |                       |                           |
| <b>Page 16: [6] Formatted</b> | <b>Joram Hooghiem</b> | <b>7/13/18 4:42:00 PM</b> |
| Underline, English (UK)       |                       |                           |
| <b>Page 16: [6] Formatted</b> | <b>Joram Hooghiem</b> | <b>7/13/18 4:42:00 PM</b> |
| Underline, English (UK)       |                       |                           |
| <b>Page 16: [6] Formatted</b> | <b>Joram Hooghiem</b> | <b>7/13/18 4:42:00 PM</b> |
| Underline, English (UK)       |                       |                           |
| <b>Page 16: [6] Formatted</b> | <b>Joram Hooghiem</b> | <b>7/13/18 4:42:00 PM</b> |
| Underline, English (UK)       |                       |                           |
| <b>Page 16: [6] Formatted</b> | <b>Joram Hooghiem</b> | <b>7/13/18 4:42:00 PM</b> |
| Underline, English (UK)       |                       |                           |
| <b>Page 16: [7] Formatted</b> | <b>Joram Hooghiem</b> | <b>7/13/18 4:42:00 PM</b> |
| Underline, English (UK)       |                       |                           |
| <b>Page 16: [7] Formatted</b> | <b>Joram Hooghiem</b> | <b>7/13/18 4:42:00 PM</b> |
| Underline, English (UK)       |                       |                           |
| <b>Page 16: [7] Formatted</b> | <b>Joram Hooghiem</b> | <b>7/13/18 4:42:00 PM</b> |
| Underline, English (UK)       |                       |                           |
| <b>Page 16: [7] Formatted</b> | <b>Joram Hooghiem</b> | <b>7/13/18 4:42:00 PM</b> |
| Underline, English (UK)       |                       |                           |
| <b>Page 16: [7] Formatted</b> | <b>Joram Hooghiem</b> | <b>7/13/18 4:42:00 PM</b> |
| Underline, English (UK)       |                       |                           |
| <b>Page 16: [8] Formatted</b> | <b>Joram Hooghiem</b> | <b>7/13/18 4:42:00 PM</b> |
| Underline, English (UK)       |                       |                           |

|                                |                       |                           |
|--------------------------------|-----------------------|---------------------------|
| <b>Page 16: [8] Formatted</b>  | <b>Joram Hooghiem</b> | <b>7/13/18 4:42:00 PM</b> |
| Underline, English (UK)        |                       |                           |
| <b>Page 16: [8] Formatted</b>  | <b>Joram Hooghiem</b> | <b>7/13/18 4:42:00 PM</b> |
| Underline, English (UK)        |                       |                           |
| <b>Page 16: [9] Formatted</b>  | <b>Joram Hooghiem</b> | <b>7/13/18 4:42:00 PM</b> |
| Underline, English (UK)        |                       |                           |
| <b>Page 16: [9] Formatted</b>  | <b>Joram Hooghiem</b> | <b>7/13/18 4:42:00 PM</b> |
| Underline, English (UK)        |                       |                           |
| <b>Page 16: [9] Formatted</b>  | <b>Joram Hooghiem</b> | <b>7/13/18 4:42:00 PM</b> |
| Underline, English (UK)        |                       |                           |
| <b>Page 16: [10] Formatted</b> | <b>Joram Hooghiem</b> | <b>7/13/18 4:42:00 PM</b> |
| Underline, English (UK)        |                       |                           |
| <b>Page 16: [10] Formatted</b> | <b>Joram Hooghiem</b> | <b>7/13/18 4:42:00 PM</b> |
| Underline, English (UK)        |                       |                           |
| <b>Page 16: [10] Formatted</b> | <b>Joram Hooghiem</b> | <b>7/13/18 4:42:00 PM</b> |
| Underline, English (UK)        |                       |                           |
| <b>Page 16: [10] Formatted</b> | <b>Joram Hooghiem</b> | <b>7/13/18 4:42:00 PM</b> |
| Underline, English (UK)        |                       |                           |
| <b>Page 16: [10] Formatted</b> | <b>Joram Hooghiem</b> | <b>7/13/18 4:42:00 PM</b> |
| Underline, English (UK)        |                       |                           |
| <b>Page 16: [10] Formatted</b> | <b>Joram Hooghiem</b> | <b>7/13/18 4:42:00 PM</b> |
| Underline, English (UK)        |                       |                           |
| <b>Page 16: [11] Formatted</b> | <b>Joram Hooghiem</b> | <b>7/13/18 4:42:00 PM</b> |
| Underline, English (UK)        |                       |                           |
| <b>Page 16: [11] Formatted</b> | <b>Joram Hooghiem</b> | <b>7/13/18 4:42:00 PM</b> |
| Underline, English (UK)        |                       |                           |
| <b>Page 16: [11] Formatted</b> | <b>Joram Hooghiem</b> | <b>7/13/18 4:42:00 PM</b> |
| Underline, English (UK)        |                       |                           |
| <b>Page 16: [12] Formatted</b> | <b>Joram Hooghiem</b> | <b>7/13/18 4:42:00 PM</b> |
| Underline, English (UK)        |                       |                           |
| <b>Page 16: [12] Formatted</b> | <b>Joram Hooghiem</b> | <b>7/13/18 4:42:00 PM</b> |
| Underline, English (UK)        |                       |                           |
| <b>Page 16: [12] Formatted</b> | <b>Joram Hooghiem</b> | <b>7/13/18 4:42:00 PM</b> |
| Underline, English (UK)        |                       |                           |
| <b>Page 16: [13] Formatted</b> | <b>Joram Hooghiem</b> | <b>7/13/18 4:42:00 PM</b> |
| Underline, English (UK)        |                       |                           |
| <b>Page 16: [13] Formatted</b> | <b>Joram Hooghiem</b> | <b>7/13/18 4:42:00 PM</b> |
| Underline, English (UK)        |                       |                           |

[illegible]

[illegible]

[illegible]



|                                |                       |                           |
|--------------------------------|-----------------------|---------------------------|
| <b>Page 16: [21] Formatted</b> | <b>Joram Hooghiem</b> | <b>7/13/18 4:42:00 PM</b> |
| Underline, English (UK)        |                       |                           |
| <b>Page 16: [21] Formatted</b> | <b>Joram Hooghiem</b> | <b>7/13/18 4:42:00 PM</b> |
| Underline, English (UK)        |                       |                           |
| <b>Page 16: [21] Formatted</b> | <b>Joram Hooghiem</b> | <b>7/13/18 4:42:00 PM</b> |
| Underline, English (UK)        |                       |                           |
| <b>Page 16: [21] Formatted</b> | <b>Joram Hooghiem</b> | <b>7/13/18 4:42:00 PM</b> |
| Underline, English (UK)        |                       |                           |
| <b>Page 16: [21] Formatted</b> | <b>Joram Hooghiem</b> | <b>7/13/18 4:42:00 PM</b> |
| Underline, English (UK)        |                       |                           |
| <b>Page 16: [21] Formatted</b> | <b>Joram Hooghiem</b> | <b>7/13/18 4:42:00 PM</b> |
| Underline, English (UK)        |                       |                           |
| <b>Page 16: [22] Formatted</b> | <b>Joram Hooghiem</b> | <b>7/13/18 4:42:00 PM</b> |
| Underline, English (UK)        |                       |                           |
| <b>Page 16: [22] Formatted</b> | <b>Joram Hooghiem</b> | <b>7/13/18 4:42:00 PM</b> |
| Underline, English (UK)        |                       |                           |
| <b>Page 16: [22] Formatted</b> | <b>Joram Hooghiem</b> | <b>7/13/18 4:42:00 PM</b> |
| Underline, English (UK)        |                       |                           |
| <b>Page 16: [23] Formatted</b> | <b>Joram Hooghiem</b> | <b>7/13/18 4:42:00 PM</b> |
| Underline, English (UK)        |                       |                           |
| <b>Page 16: [23] Formatted</b> | <b>Joram Hooghiem</b> | <b>7/13/18 4:42:00 PM</b> |
| Underline, English (UK)        |                       |                           |
| <b>Page 16: [23] Formatted</b> | <b>Joram Hooghiem</b> | <b>7/13/18 4:42:00 PM</b> |
| Underline, English (UK)        |                       |                           |
| <b>Page 16: [24] Formatted</b> | <b>Joram Hooghiem</b> | <b>7/13/18 4:42:00 PM</b> |
| Underline, English (UK)        |                       |                           |
| <b>Page 16: [24] Formatted</b> | <b>Joram Hooghiem</b> | <b>7/13/18 4:42:00 PM</b> |
| Underline, English (UK)        |                       |                           |
| <b>Page 16: [24] Formatted</b> | <b>Joram Hooghiem</b> | <b>7/13/18 4:42:00 PM</b> |
| Underline, English (UK)        |                       |                           |
| <b>Page 16: [25] Formatted</b> | <b>Joram Hooghiem</b> | <b>7/13/18 4:42:00 PM</b> |
| Underline, English (UK)        |                       |                           |
| <b>Page 16: [25] Formatted</b> | <b>Joram Hooghiem</b> | <b>7/13/18 4:42:00 PM</b> |
| Underline, English (UK)        |                       |                           |
| <b>Page 16: [25] Formatted</b> | <b>Joram Hooghiem</b> | <b>7/13/18 4:42:00 PM</b> |
| Underline, English (UK)        |                       |                           |

|                                |                       |                           |
|--------------------------------|-----------------------|---------------------------|
| <b>Page 16: [26] Formatted</b> | <b>Joram Hooghiem</b> | <b>7/13/18 4:42:00 PM</b> |
| Underline, English (UK)        |                       |                           |
| <b>Page 16: [26] Formatted</b> | <b>Joram Hooghiem</b> | <b>7/13/18 4:42:00 PM</b> |
| Underline, English (UK)        |                       |                           |
| <b>Page 16: [26] Formatted</b> | <b>Joram Hooghiem</b> | <b>7/13/18 4:42:00 PM</b> |
| Underline, English (UK)        |                       |                           |
| <b>Page 16: [27] Formatted</b> | <b>Joram Hooghiem</b> | <b>7/13/18 4:42:00 PM</b> |
| Underline, English (UK)        |                       |                           |
| <b>Page 16: [27] Formatted</b> | <b>Joram Hooghiem</b> | <b>7/13/18 4:42:00 PM</b> |
| Underline, English (UK)        |                       |                           |
| <b>Page 16: [27] Formatted</b> | <b>Joram Hooghiem</b> | <b>7/13/18 4:42:00 PM</b> |
| Underline, English (UK)        |                       |                           |
| <b>Page 16: [27] Formatted</b> | <b>Joram Hooghiem</b> | <b>7/13/18 4:42:00 PM</b> |
| Underline, English (UK)        |                       |                           |
| <b>Page 16: [27] Formatted</b> | <b>Joram Hooghiem</b> | <b>7/13/18 4:42:00 PM</b> |
| Underline, English (UK)        |                       |                           |
| <b>Page 16: [28] Formatted</b> | <b>Joram Hooghiem</b> | <b>7/13/18 4:42:00 PM</b> |
| Underline, English (UK)        |                       |                           |
| <b>Page 16: [28] Formatted</b> | <b>Joram Hooghiem</b> | <b>7/13/18 4:42:00 PM</b> |
| Underline, English (UK)        |                       |                           |
| <b>Page 16: [28] Formatted</b> | <b>Joram Hooghiem</b> | <b>7/13/18 4:42:00 PM</b> |
| Underline, English (UK)        |                       |                           |
| <b>Page 16: [28] Formatted</b> | <b>Joram Hooghiem</b> | <b>7/13/18 4:42:00 PM</b> |
| Underline, English (UK)        |                       |                           |
| <b>Page 16: [28] Formatted</b> | <b>Joram Hooghiem</b> | <b>7/13/18 4:42:00 PM</b> |
| Underline, English (UK)        |                       |                           |
| <b>Page 16: [28] Formatted</b> | <b>Joram Hooghiem</b> | <b>7/13/18 4:42:00 PM</b> |
| Underline, English (UK)        |                       |                           |
| <b>Page 16: [29] Formatted</b> | <b>Joram Hooghiem</b> | <b>7/13/18 4:42:00 PM</b> |
| Underline, English (UK)        |                       |                           |

|                         |                |                    |
|-------------------------|----------------|--------------------|
| Page 16: [29] Formatted | Joram Hooghiem | 7/13/18 4:42:00 PM |
|-------------------------|----------------|--------------------|

Underline, English (UK)

|                         |                |                    |
|-------------------------|----------------|--------------------|
| Page 16: [29] Formatted | Joram Hooghiem | 7/13/18 4:42:00 PM |
|-------------------------|----------------|--------------------|

Underline, English (UK)

|                         |                |                    |
|-------------------------|----------------|--------------------|
| Page 16: [30] Formatted | Joram Hooghiem | 7/13/18 4:42:00 PM |
|-------------------------|----------------|--------------------|

Underline, English (UK)

|                         |                |                    |
|-------------------------|----------------|--------------------|
| Page 16: [30] Formatted | Joram Hooghiem | 7/13/18 4:42:00 PM |
|-------------------------|----------------|--------------------|

Underline, English (UK)

|                         |                |                    |
|-------------------------|----------------|--------------------|
| Page 16: [30] Formatted | Joram Hooghiem | 7/13/18 4:42:00 PM |
|-------------------------|----------------|--------------------|

Underline, English (UK)

|                         |                |                    |
|-------------------------|----------------|--------------------|
| Page 16: [31] Formatted | Joram Hooghiem | 7/13/18 4:42:00 PM |
|-------------------------|----------------|--------------------|

Underline, English (UK)

|                         |                |                    |
|-------------------------|----------------|--------------------|
| Page 16: [31] Formatted | Joram Hooghiem | 7/13/18 4:42:00 PM |
|-------------------------|----------------|--------------------|

Underline, English (UK)

|                         |                |                    |
|-------------------------|----------------|--------------------|
| Page 16: [31] Formatted | Joram Hooghiem | 7/13/18 4:42:00 PM |
|-------------------------|----------------|--------------------|

Underline, English (UK)

|                         |                |                    |
|-------------------------|----------------|--------------------|
| Page 16: [32] Formatted | Joram Hooghiem | 7/13/18 4:42:00 PM |
|-------------------------|----------------|--------------------|

Underline, English (UK)

|                         |                |                    |
|-------------------------|----------------|--------------------|
| Page 16: [32] Formatted | Joram Hooghiem | 7/13/18 4:42:00 PM |
|-------------------------|----------------|--------------------|

Underline, English (UK)

|                         |                |                    |
|-------------------------|----------------|--------------------|
| Page 16: [32] Formatted | Joram Hooghiem | 7/13/18 4:42:00 PM |
|-------------------------|----------------|--------------------|

Underline, English (UK)

|                       |                |                   |
|-----------------------|----------------|-------------------|
| Page 27: [33] Deleted | Joram Hooghiem | 4/5/18 4:17:00 PM |
|-----------------------|----------------|-------------------|

Table 2: Fit constants for Eq. (3) and standard error of the fit.

| Parameter | Value  | Error (1 $\sigma$ ) |
|-----------|--------|---------------------|
| x         | 0.0080 | 0.00003             |
| b         | 0.0050 | 0.00002             |
| $\tau$    | 59.61  | 0.82                |

|                       |                |                    |
|-----------------------|----------------|--------------------|
| Page 28: [34] Deleted | Joram Hooghiem | 3/23/18 9:27:00 AM |
|-----------------------|----------------|--------------------|

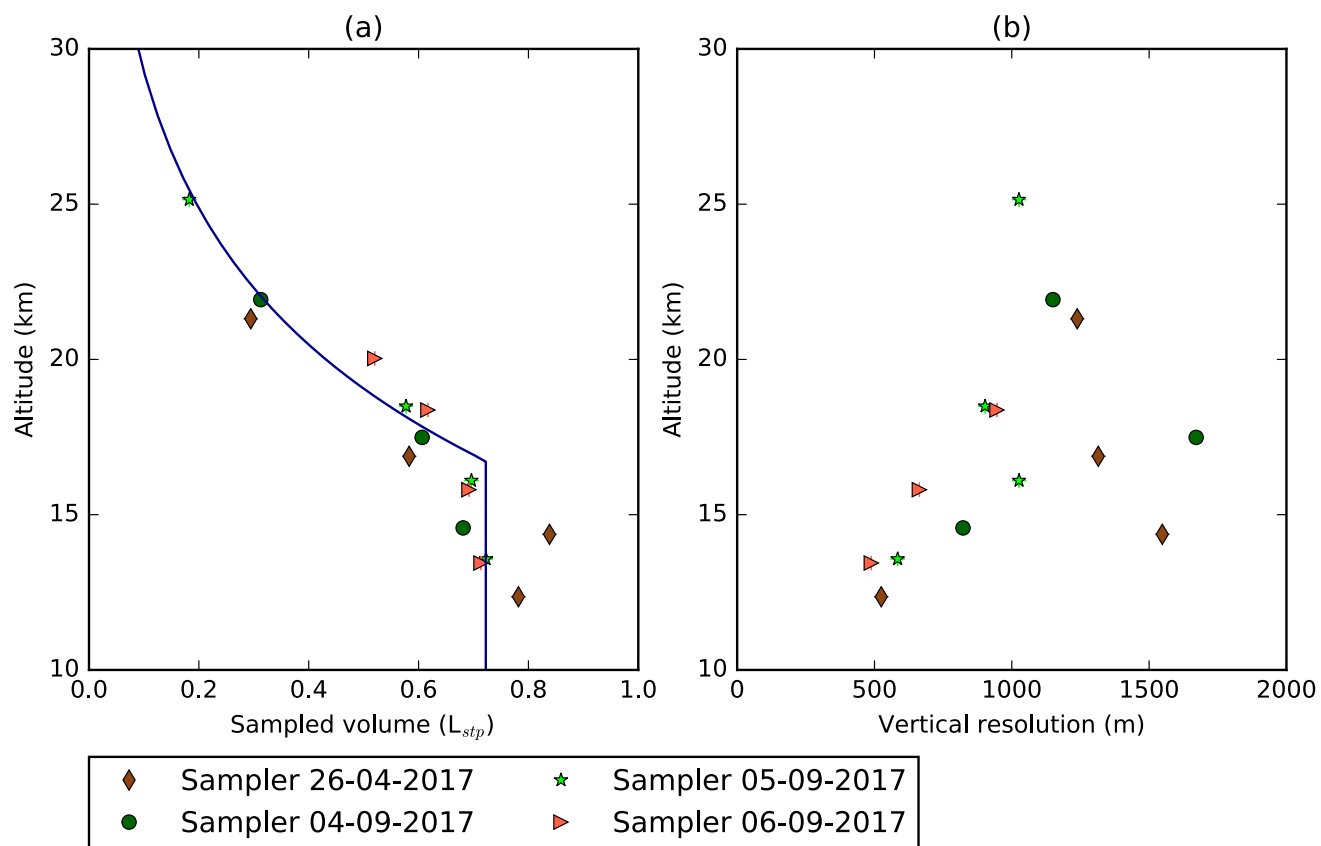











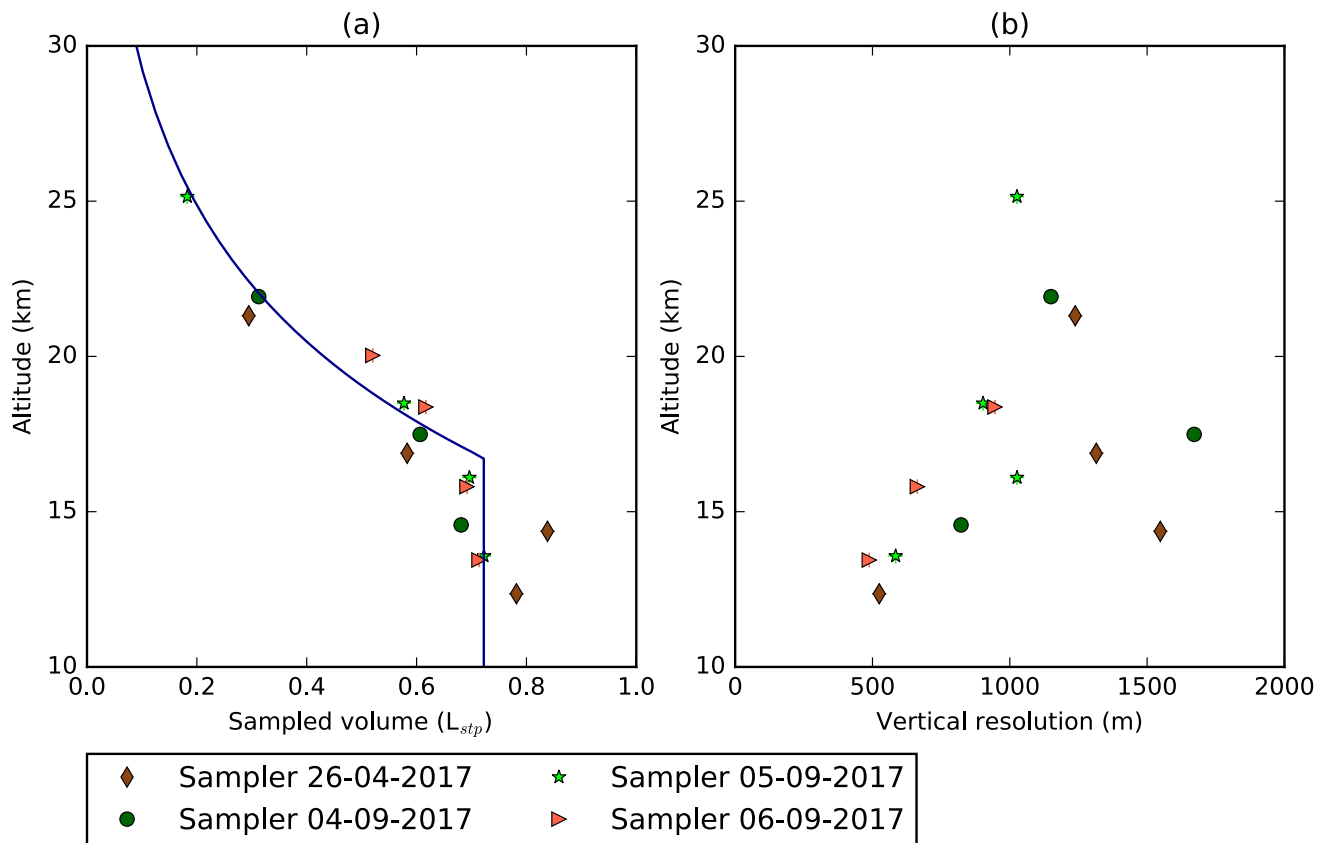

Page 28: [35] Formatted Joram Hooghiem 7/13/18 4:42:00 PM

Font: 10 pt

Page 28: [35] Formatted Joram Hooghiem 7/13/18 4:42:00 PM

Font: 10 pt

Page 28: [36] Formatted Joram Hooghiem 7/13/18 4:42:00 PM

Font: 10 pt

Page 28: [36] Formatted Joram Hooghiem 7/13/18 4:42:00 PM

Font: 10 pt

Page 28: [37] Deleted Joram Hooghiem 3/29/18 9:29:00 AM

0

Page 28: [37] Deleted Joram Hooghiem 3/29/18 9:29:00 AM

0

Page 28: [38] Deleted Joram Hooghiem 3/29/18 9:29:00 AM

4

Page 28: [38] Deleted Joram Hooghiem 3/29/18 9:29:00 AM

4

Page 28: [39] Deleted Joram Hooghiem 3/29/18 9:29:00 AM

19

Page 28: [39] Deleted Joram Hooghiem 3/29/18 9:29:00 AM

Page 30: [40] Change

Unknown

Field Code Changed

Page 30: [40] Change

Unknown

Field Code Changed

Page 30: [41] Deleted

Joram Hooghiem

7/6/18 10:58:00 AM

Table 6: Expected bias due to the limited accuracy of the LISA sampler. Typical values for the troposphere and stratosphere are taken from the indicated references: A) (Troler et al., 1996) B) (Mrozek et al., 2016) C) (Nisbet et al., 2016) D) (Bergamaschi et al., 2001) E) (Aoki et al., 2003) and F) (Röckmann et al., 2011).  $f_c$  was calculated using a source value 390 ppm (CO<sub>2</sub>) and 1000 ppb (CH<sub>4</sub>); contamination values of 0.55 ppm (CO<sub>2</sub>) and 5.1 ppb (CH<sub>4</sub>). Reported measurement reproducibility's for stratospheric air are also provided.

|                                        |
|----------------------------------------|
| Measurement<br>Reproducibil<br>ity (‰) |
| 0.02 (E)                               |
| 0.05 (E)                               |
| 0.2 (B)                                |
| 0.7 (F)                                |
| 2.3 (F)                                |

Page 30: [42] Formatted

Joram Hooghiem

7/13/18 4:42:00 PM

Font: Times New Roman, Font color: Auto, English (UK)

Page 30: [42] Formatted

Joram Hooghiem

7/13/18 4:42:00 PM

Font: Times New Roman, Font color: Auto, English (UK)

Page 30: [42] Formatted

Joram Hooghiem

7/13/18 4:42:00 PM

Font: Times New Roman, Font color: Auto, English (UK)

Page 30: [42] Formatted

Joram Hooghiem

7/13/18 4:42:00 PM

Font: Times New Roman, Font color: Auto, English (UK)

Page 30: [42] Formatted

Joram Hooghiem

7/13/18 4:42:00 PM

Font: Times New Roman, Font color: Auto, English (UK)

Page 30: [42] Formatted

Joram Hooghiem

7/13/18 4:42:00 PM

Font: Times New Roman, Font color: Auto, English (UK)

Page 30: [42] Formatted

Joram Hooghiem

7/13/18 4:42:00 PM

Font: Times New Roman, Font color: Auto, English (UK)

Page 30: [42] Formatted

Joram Hooghiem

7/13/18 4:42:00 PM

Font: Times New Roman, Font color: Auto, English (UK)

Page 30: [42] Formatted

Joram Hooghiem

7/13/18 4:42:00 PM

Font: Times New Roman, Font color: Auto, English (UK)

Page 30: [43] Formatted

Joram Hooghiem

7/13/18 4:42:00 PM

Font: 10 pt, English (UK)

|                         |                |                    |
|-------------------------|----------------|--------------------|
| Page 30: [43] Formatted | Joram Hooghiem | 7/13/18 4:42:00 PM |
|-------------------------|----------------|--------------------|

Font: 10 pt, English (UK)

|                         |                |                    |
|-------------------------|----------------|--------------------|
| Page 30: [43] Formatted | Joram Hooghiem | 7/13/18 4:42:00 PM |
|-------------------------|----------------|--------------------|

Font: 10 pt, English (UK)

|                         |                |                    |
|-------------------------|----------------|--------------------|
| Page 30: [44] Formatted | Joram Hooghiem | 7/13/18 4:42:00 PM |
|-------------------------|----------------|--------------------|

Font: 10 pt, English (UK)

|                         |                |                    |
|-------------------------|----------------|--------------------|
| Page 30: [44] Formatted | Joram Hooghiem | 7/13/18 4:42:00 PM |
|-------------------------|----------------|--------------------|

Font: 10 pt, English (UK)

|                         |                |                    |
|-------------------------|----------------|--------------------|
| Page 30: [44] Formatted | Joram Hooghiem | 7/13/18 4:42:00 PM |
|-------------------------|----------------|--------------------|

Font: 10 pt, English (UK)

|                         |                |                    |
|-------------------------|----------------|--------------------|
| Page 30: [45] Formatted | Joram Hooghiem | 7/13/18 4:42:00 PM |
|-------------------------|----------------|--------------------|

Font: 10 pt, English (UK)

|                         |                |                    |
|-------------------------|----------------|--------------------|
| Page 30: [45] Formatted | Joram Hooghiem | 7/13/18 4:42:00 PM |
|-------------------------|----------------|--------------------|

Font: 10 pt, English (UK)

|                         |                |                    |
|-------------------------|----------------|--------------------|
| Page 30: [45] Formatted | Joram Hooghiem | 7/13/18 4:42:00 PM |
|-------------------------|----------------|--------------------|

Font: 10 pt, English (UK)

|                         |                |                    |
|-------------------------|----------------|--------------------|
| Page 30: [46] Formatted | Joram Hooghiem | 7/13/18 4:42:00 PM |
|-------------------------|----------------|--------------------|

Font: 10 pt, English (UK)

|                         |                |                    |
|-------------------------|----------------|--------------------|
| Page 30: [46] Formatted | Joram Hooghiem | 7/13/18 4:42:00 PM |
|-------------------------|----------------|--------------------|

Font: 10 pt, English (UK)

|                         |                |                    |
|-------------------------|----------------|--------------------|
| Page 30: [46] Formatted | Joram Hooghiem | 7/13/18 4:42:00 PM |
|-------------------------|----------------|--------------------|

Font: 10 pt, English (UK)

|                         |                |                    |
|-------------------------|----------------|--------------------|
| Page 30: [47] Formatted | Joram Hooghiem | 7/13/18 4:42:00 PM |
|-------------------------|----------------|--------------------|

Font: 10 pt, English (UK)

|                         |                |                    |
|-------------------------|----------------|--------------------|
| Page 30: [47] Formatted | Joram Hooghiem | 7/13/18 4:42:00 PM |
|-------------------------|----------------|--------------------|

Font: 10 pt, English (UK)

|                         |                |                    |
|-------------------------|----------------|--------------------|
| Page 30: [47] Formatted | Joram Hooghiem | 7/13/18 4:42:00 PM |
|-------------------------|----------------|--------------------|

Font: 10 pt, English (UK)

|                         |                |                    |
|-------------------------|----------------|--------------------|
| Page 30: [48] Formatted | Joram Hooghiem | 7/13/18 4:42:00 PM |
|-------------------------|----------------|--------------------|

Font: 10 pt, English (UK)

|                         |                |                    |
|-------------------------|----------------|--------------------|
| Page 30: [48] Formatted | Joram Hooghiem | 7/13/18 4:42:00 PM |
|-------------------------|----------------|--------------------|

Font: 10 pt, English (UK)

|                         |                |                    |
|-------------------------|----------------|--------------------|
| Page 30: [48] Formatted | Joram Hooghiem | 7/13/18 4:42:00 PM |
|-------------------------|----------------|--------------------|

Font: 10 pt, English (UK)

|                         |                |                    |
|-------------------------|----------------|--------------------|
| Page 30: [49] Formatted | Joram Hooghiem | 7/13/18 4:42:00 PM |
|-------------------------|----------------|--------------------|

Font: 10 pt, English (UK)

|                         |                |                    |
|-------------------------|----------------|--------------------|
| Page 30: [49] Formatted | Joram Hooghiem | 7/13/18 4:42:00 PM |
|-------------------------|----------------|--------------------|

Font: 10 pt, English (UK)

|                         |                |                    |
|-------------------------|----------------|--------------------|
| Page 30: [49] Formatted | Joram Hooghiem | 7/13/18 4:42:00 PM |
|-------------------------|----------------|--------------------|

Font: 10 pt, English (UK)

|                         |                |                    |
|-------------------------|----------------|--------------------|
| Page 30: [50] Formatted | Joram Hooghiem | 7/13/18 4:42:00 PM |
|-------------------------|----------------|--------------------|

Font: 10 pt, English (UK)

|                         |                |                    |
|-------------------------|----------------|--------------------|
| Page 30: [50] Formatted | Joram Hooghiem | 7/13/18 4:42:00 PM |
|-------------------------|----------------|--------------------|

Font: 10 pt, English (UK)

|                         |                |                    |
|-------------------------|----------------|--------------------|
| Page 30: [50] Formatted | Joram Hooghiem | 7/13/18 4:42:00 PM |
|-------------------------|----------------|--------------------|

Font: 10 pt, English (UK)

|                         |                |                    |
|-------------------------|----------------|--------------------|
| Page 30: [51] Formatted | Joram Hooghiem | 7/13/18 4:42:00 PM |
|-------------------------|----------------|--------------------|

Font: 10 pt, English (UK)

|                         |                |                    |
|-------------------------|----------------|--------------------|
| Page 30: [51] Formatted | Joram Hooghiem | 7/13/18 4:42:00 PM |
|-------------------------|----------------|--------------------|

Font: 10 pt, English (UK)

|                         |                |                    |
|-------------------------|----------------|--------------------|
| Page 30: [51] Formatted | Joram Hooghiem | 7/13/18 4:42:00 PM |
|-------------------------|----------------|--------------------|

Font: 10 pt, English (UK)

|                         |                |                    |
|-------------------------|----------------|--------------------|
| Page 30: [52] Formatted | Joram Hooghiem | 7/13/18 4:42:00 PM |
|-------------------------|----------------|--------------------|

Font: 10 pt, English (UK)

|                         |                |                    |
|-------------------------|----------------|--------------------|
| Page 30: [52] Formatted | Joram Hooghiem | 7/13/18 4:42:00 PM |
|-------------------------|----------------|--------------------|

Font: 10 pt, English (UK)

|                         |                |                    |
|-------------------------|----------------|--------------------|
| Page 30: [52] Formatted | Joram Hooghiem | 7/13/18 4:42:00 PM |
|-------------------------|----------------|--------------------|

Font: 10 pt, English (UK)

|                         |                |                    |
|-------------------------|----------------|--------------------|
| Page 30: [53] Formatted | Joram Hooghiem | 7/13/18 4:42:00 PM |
|-------------------------|----------------|--------------------|

Font: 10 pt, English (UK)

|                         |                |                    |
|-------------------------|----------------|--------------------|
| Page 30: [53] Formatted | Joram Hooghiem | 7/13/18 4:42:00 PM |
|-------------------------|----------------|--------------------|

Font: 10 pt, English (UK)

|                         |                |                    |
|-------------------------|----------------|--------------------|
| Page 30: [53] Formatted | Joram Hooghiem | 7/13/18 4:42:00 PM |
|-------------------------|----------------|--------------------|

Font: 10 pt, English (UK)

|                      |         |  |
|----------------------|---------|--|
| Page 30: [54] Change | Unknown |  |
|----------------------|---------|--|

Field Code Changed

|                      |         |  |
|----------------------|---------|--|
| Page 30: [54] Change | Unknown |  |
|----------------------|---------|--|

Field Code Changed

|                      |         |  |
|----------------------|---------|--|
| Page 30: [54] Change | Unknown |  |
|----------------------|---------|--|

Field Code Changed

|                      |         |  |
|----------------------|---------|--|
| Page 30: [54] Change | Unknown |  |
|----------------------|---------|--|

Field Code Changed

|                      |         |  |
|----------------------|---------|--|
| Page 30: [54] Change | Unknown |  |
|----------------------|---------|--|

Field Code Changed

|                      |         |  |
|----------------------|---------|--|
| Page 30: [54] Change | Unknown |  |
|----------------------|---------|--|

Field Code Changed
